# Supplementary material for: Copper-catalyzed boroacylation of allenes to access tetrasubstituted vinylboronates
Source: Royal Society of Chemistry journal article supplement (doi:10.1039/d0ob02008g), 2020-01-01

**Supporting Information For:**

# **Copper-Catalyzed Boroacylation of Allenes to Access Tetrasubstituted Vinylboronates**

Bing-Xue Shen<sup>†,‡</sup>, Xiang-Ting Min<sup>†,‡</sup>, Yan-Cheng Hu<sup>†,\*</sup>, Lei-Lei Qian<sup>†,‡</sup>, Sa-Na Yang<sup>†,‡</sup>, Boshun Wan<sup>†</sup> and Qing-An Chen<sup>†</sup>

<sup>†</sup>Dalian Institute of Chemical Physics, Chinese Academy of Sciences, Dalian 116023, China

<sup>‡</sup>University of Chinese Academy of Sciences, Beijing 100049, China

E-mail: ychu@dicp.ac.cn

## **Table of Contents**

|                                                 |           |
|-------------------------------------------------|-----------|
| <b>1. X-ray crystallographic data of 5.....</b> | <b>S2</b> |
| <b>2. NMR spectra of products.....</b>          | <b>S4</b> |

## 1. X-ray crystallographic data of 5.

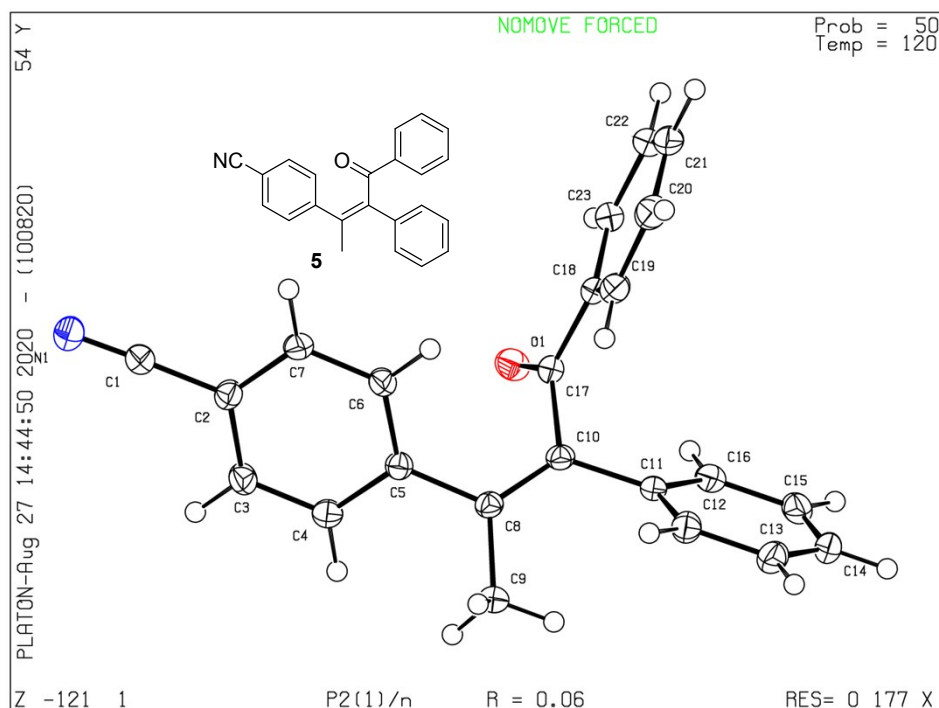

### Thermal ellipsoid was 30%

Table 1. Crystal data and structure refinement for **5**. (CCDC 2025787)

|                                  |                                      |
|----------------------------------|--------------------------------------|
| Identification code              | <b>5</b>                             |
| Empirical formula                | $C_{23}H_{17}NO$                     |
| Formula weight                   | 323.38                               |
| Temperature/K                    | 120.0                                |
| Crystal system                   | monoclinic                           |
| Space group                      | $P2_1/n$                             |
| $a/\text{\AA}$                   | 8.8725(4)                            |
| $b/\text{\AA}$                   | 11.6847(5)                           |
| $c/\text{\AA}$                   | 16.8773(8)                           |
| $\alpha/^\circ$                  | 90.00                                |
| $\beta/^\circ$                   | 102.266(2)                           |
| $\gamma/^\circ$                  | 90.00                                |
| Volume/ $\text{\AA}^3$           | 1709.77(13)                          |
| Z                                | 4                                    |
| $\rho_{\text{calc}}/\text{cm}^3$ | 1.256                                |
| $\mu/\text{mm}^{-1}$             | 0.077                                |
| F(000)                           | 680.0                                |
| Crystal size/ $\text{mm}^3$      | 0.16 × 0.14 × 0.12                   |
| Radiation                        | MoK $\alpha$ ( $\lambda = 0.71073$ ) |

2 $\Theta$  range for data collection/ $^{\circ}$  4.28 to 54.98  
Index ranges -11  $\leq$  h  $\leq$  11, -14  $\leq$  k  $\leq$  15, -21  $\leq$  l  $\leq$  21  
Reflections collected 13178  
Independent reflections 3915 [R<sub>int</sub> = 0.0304, R<sub>sigma</sub> = 0.0341]  
Data/restraints/parameters 3915/0/227  
Goodness-of-fit on F<sup>2</sup> 1.266  
Final R indexes [I  $\geq$  2 $\sigma$  (I)] R<sub>1</sub> = 0.0607, wR<sub>2</sub> = 0.1587  
Final R indexes [all data] R<sub>1</sub> = 0.0679, wR<sub>2</sub> = 0.1658  
Largest diff. peak/hole / e  $\text{\AA}^{-3}$  0.61/-0.72

## 2. NMR spectra of products.

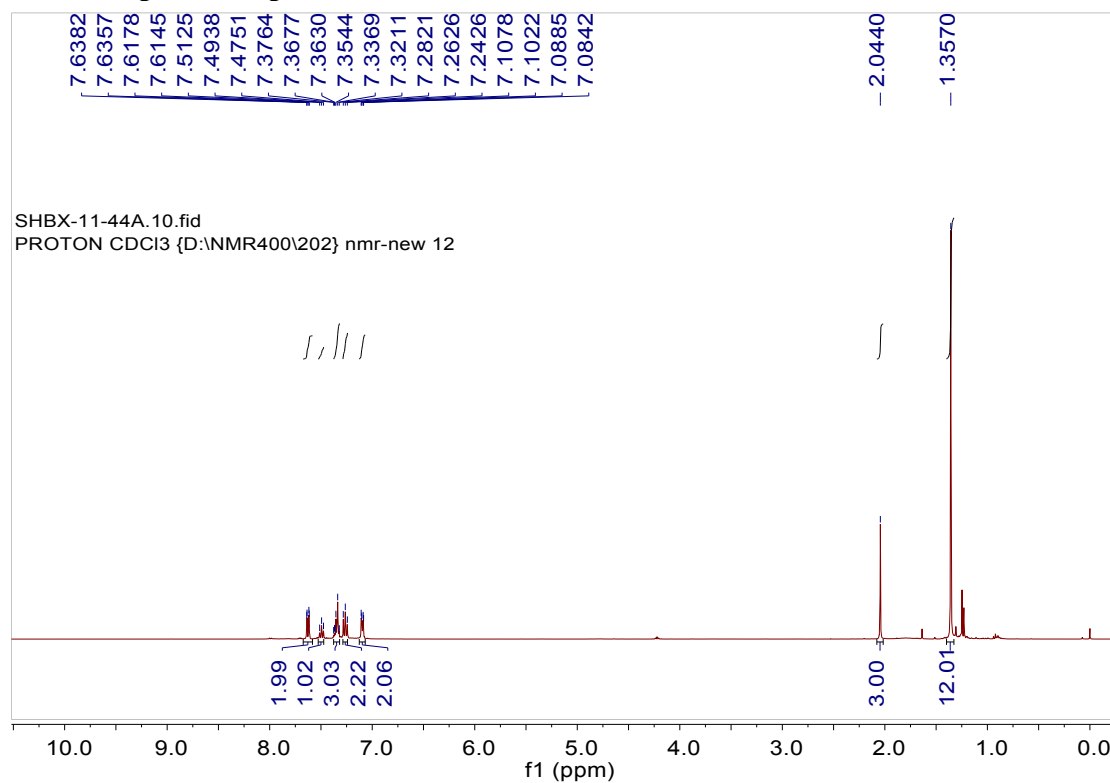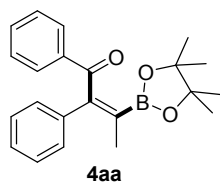

<sup>1</sup>H NMR (400 MHz, CDCl<sub>3</sub>)  
<sup>13</sup>C NMR (100 MHz, CDCl<sub>3</sub>)

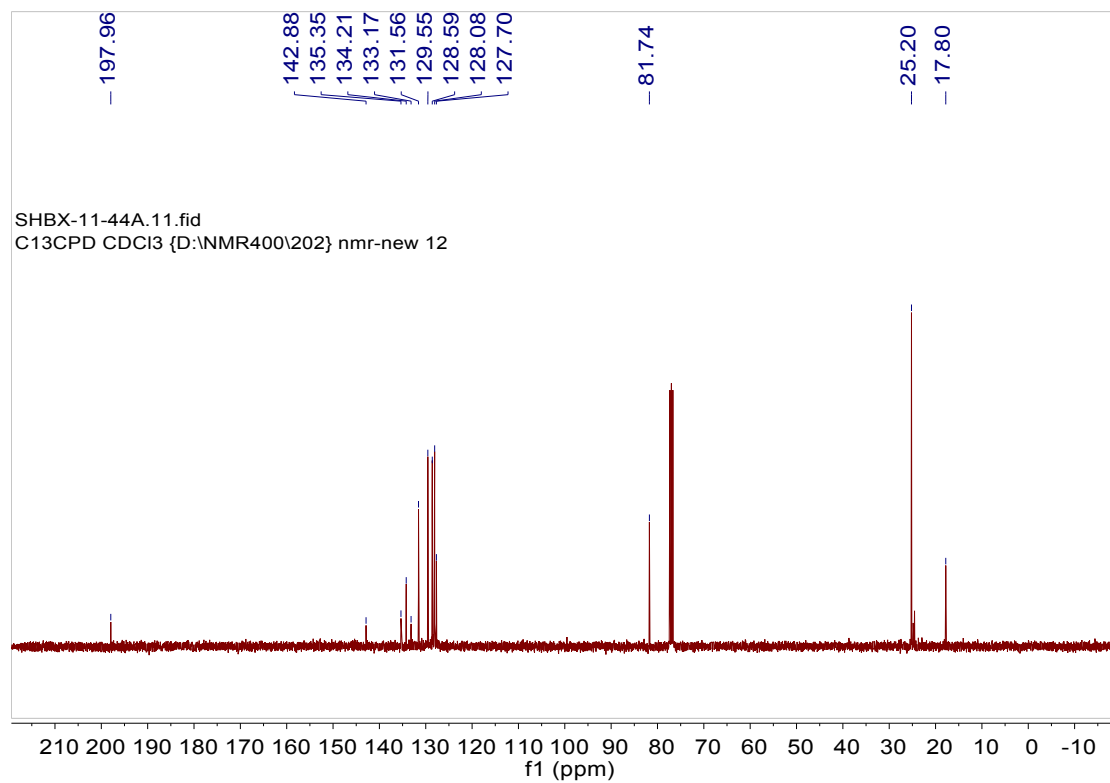

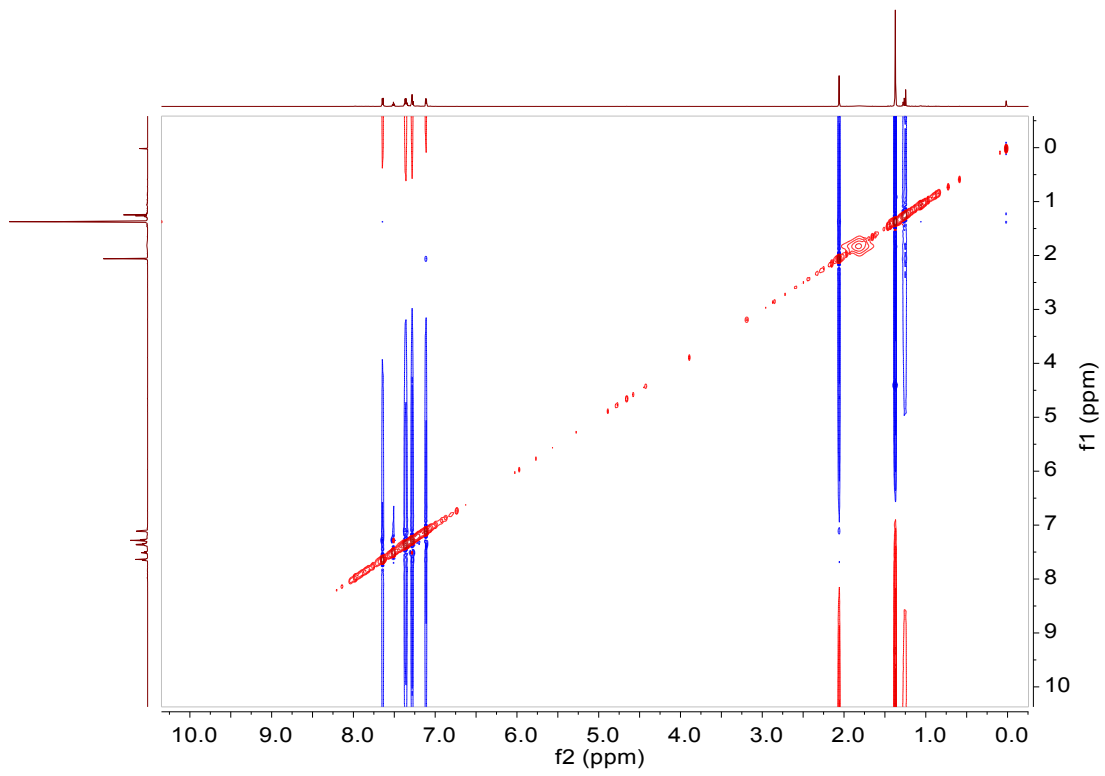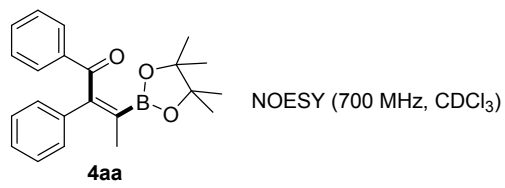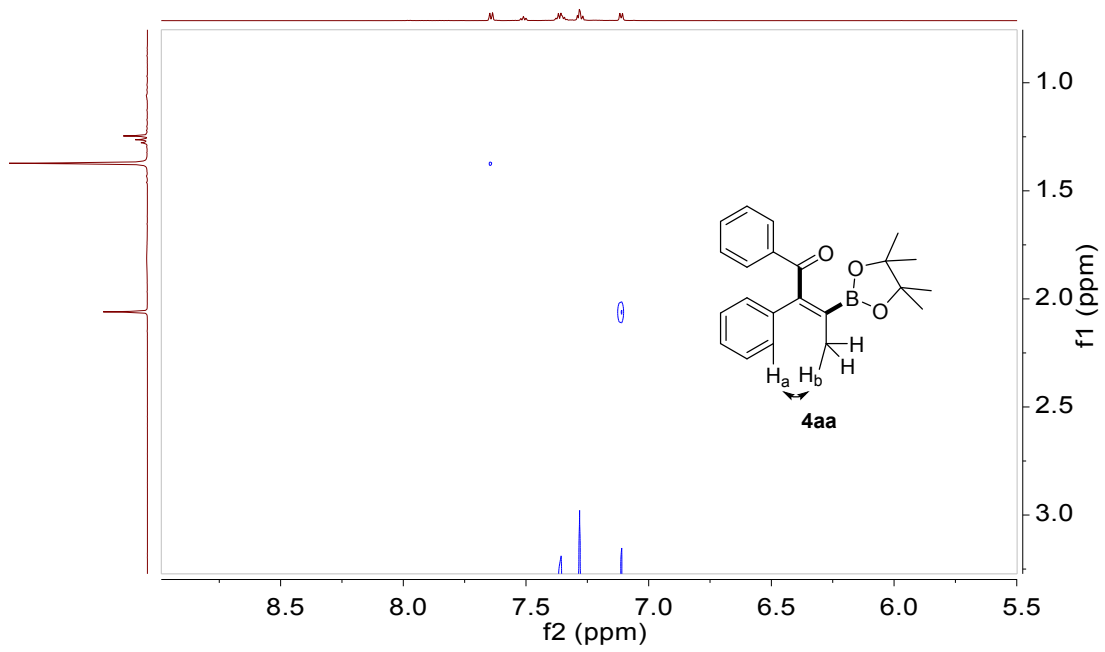

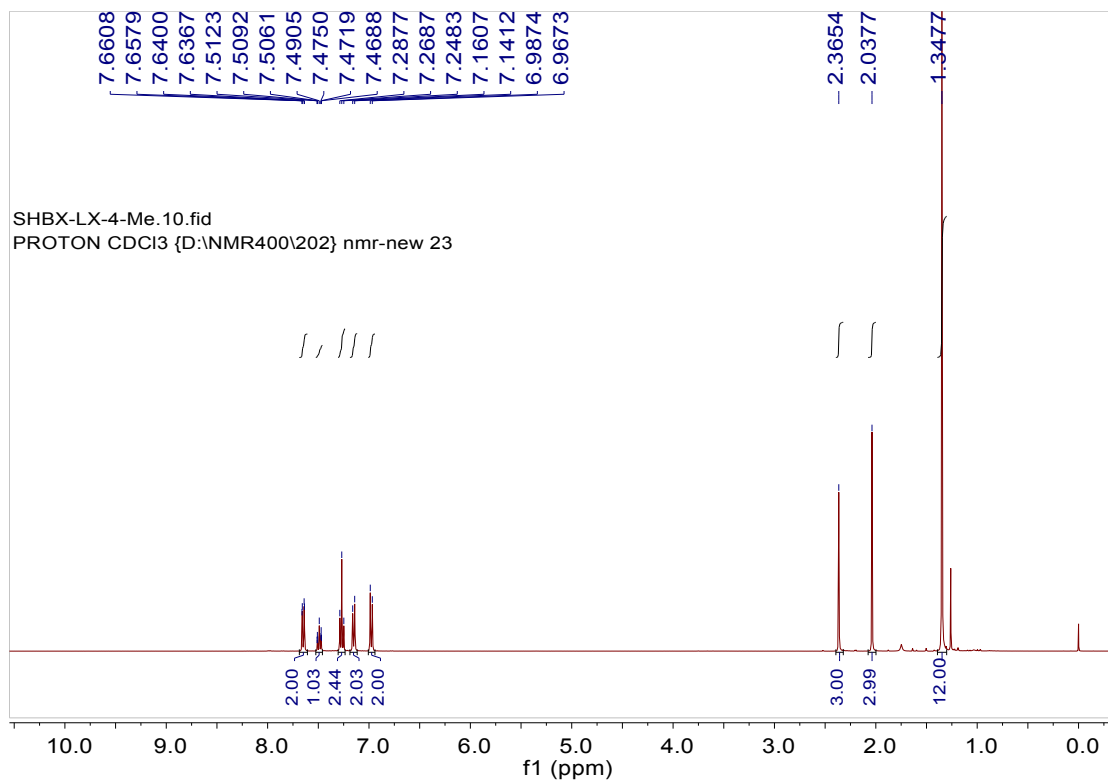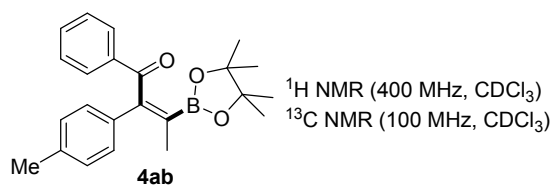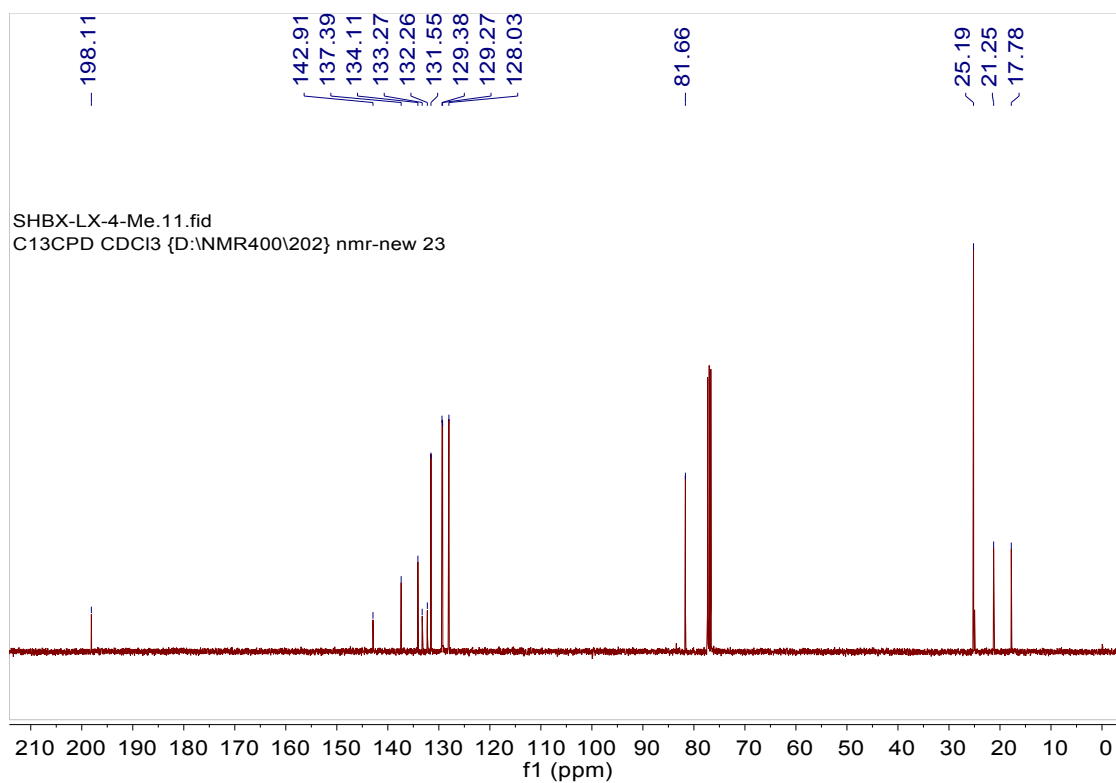

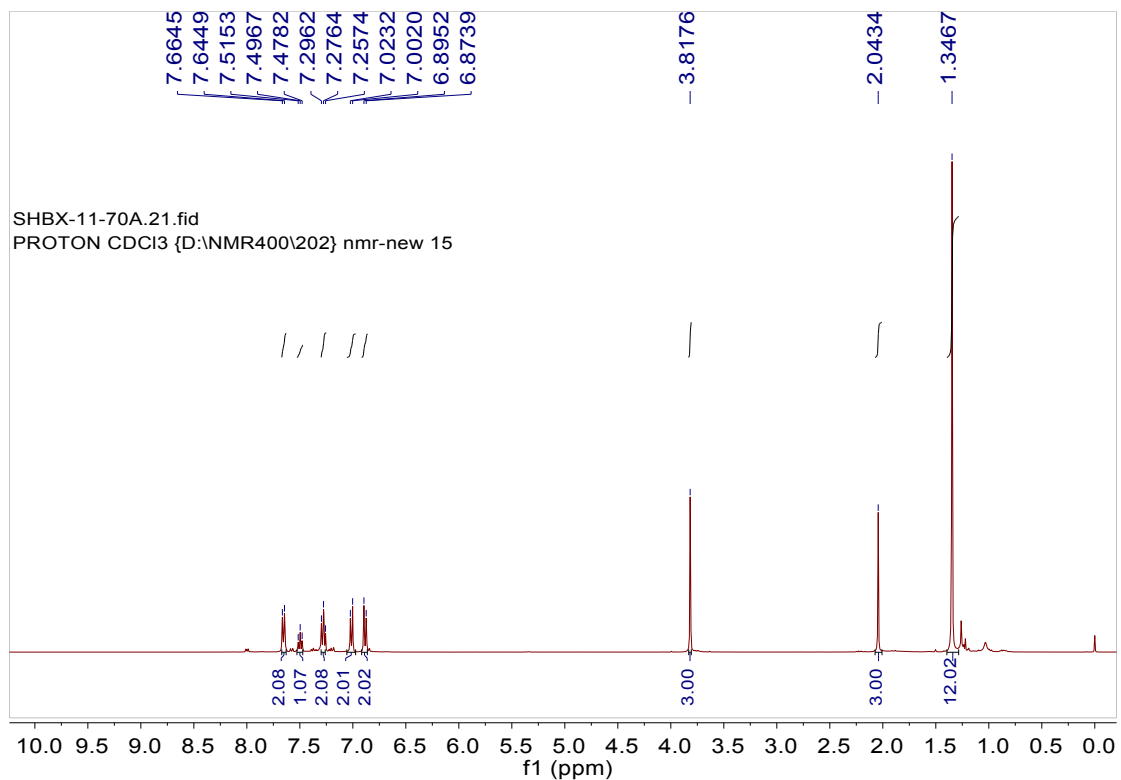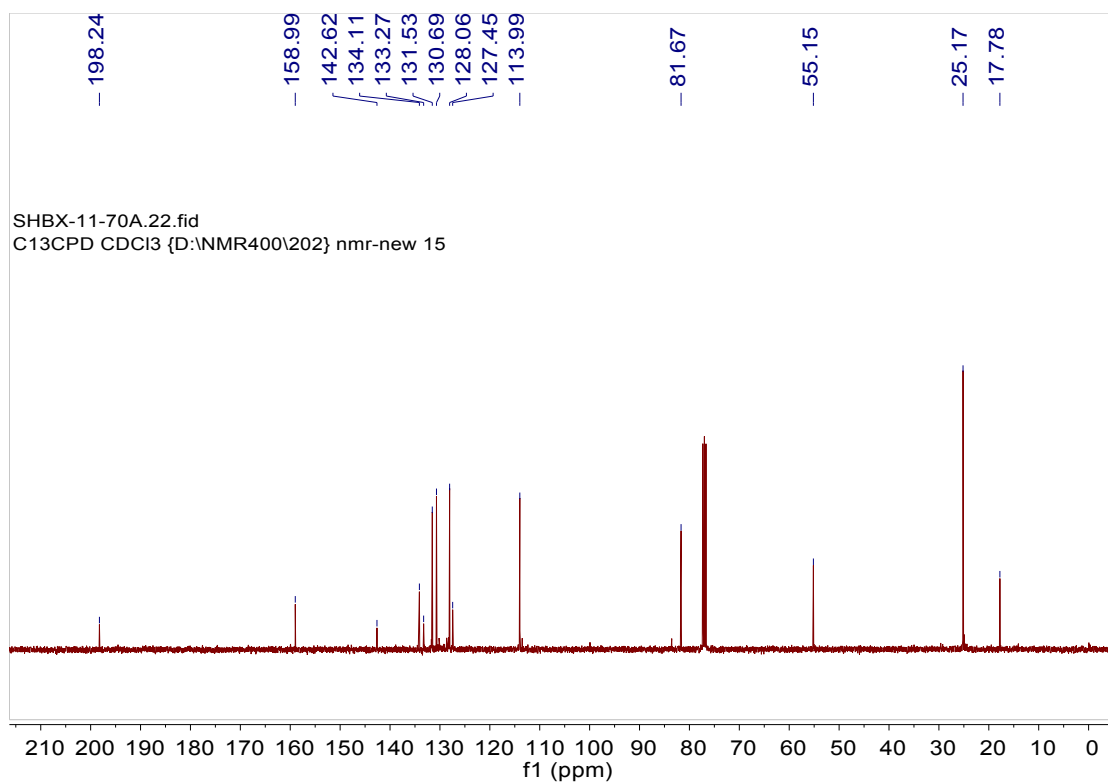

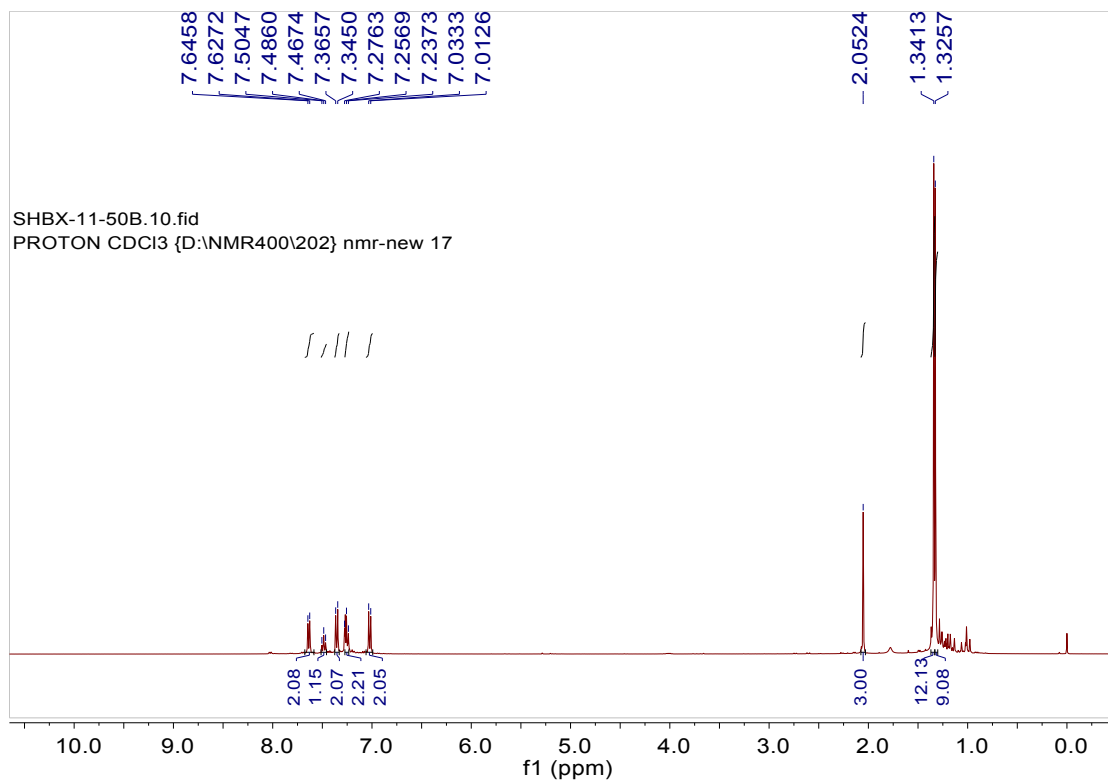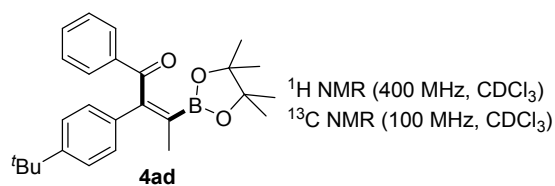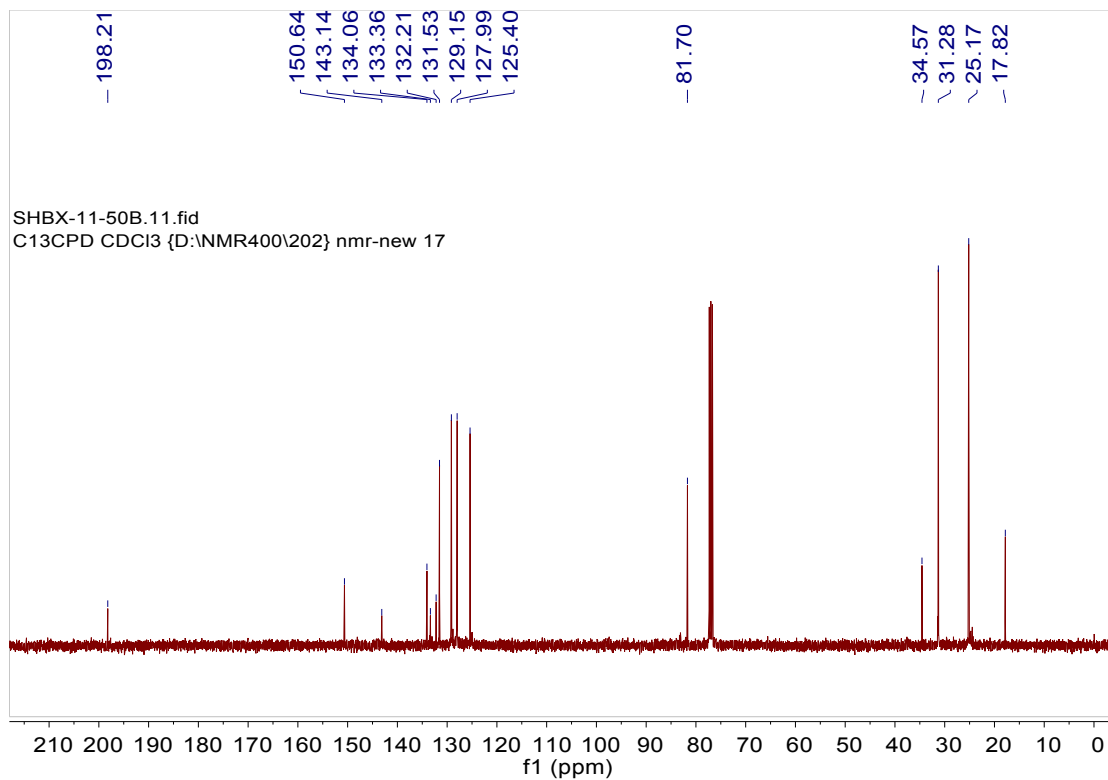



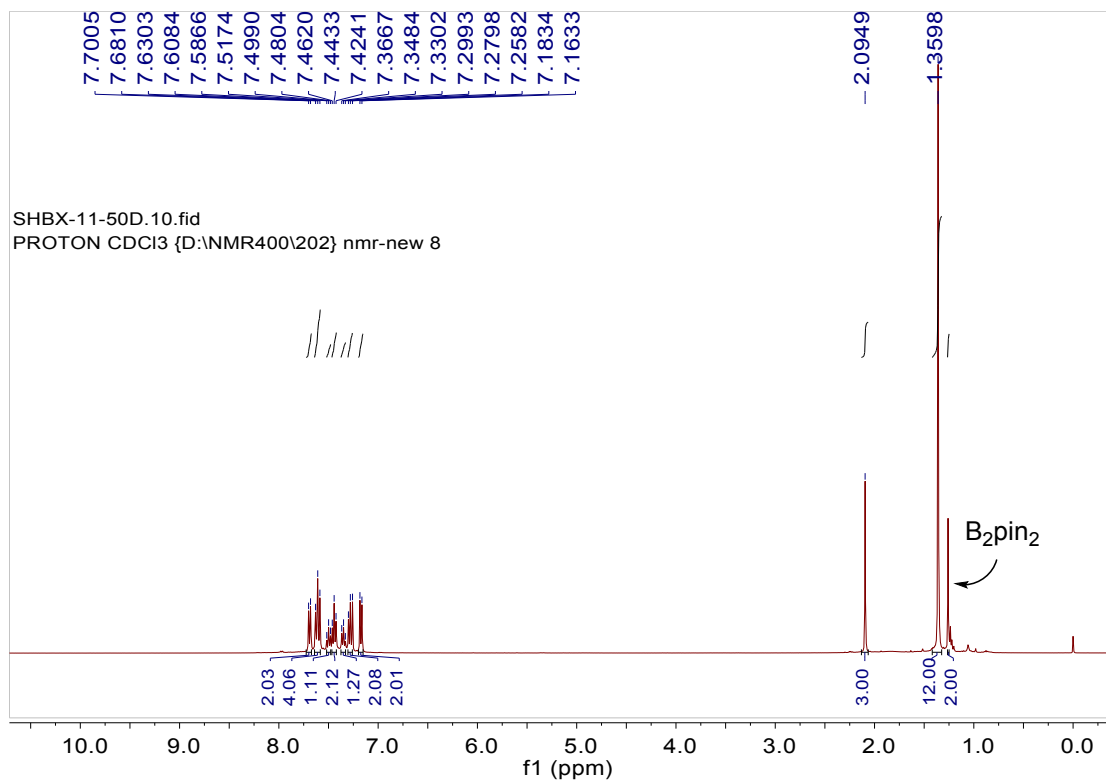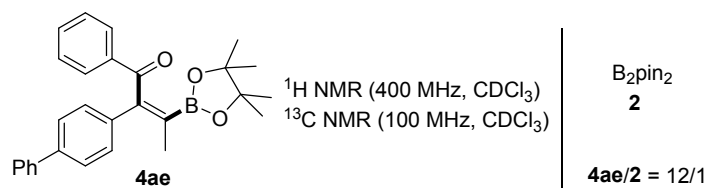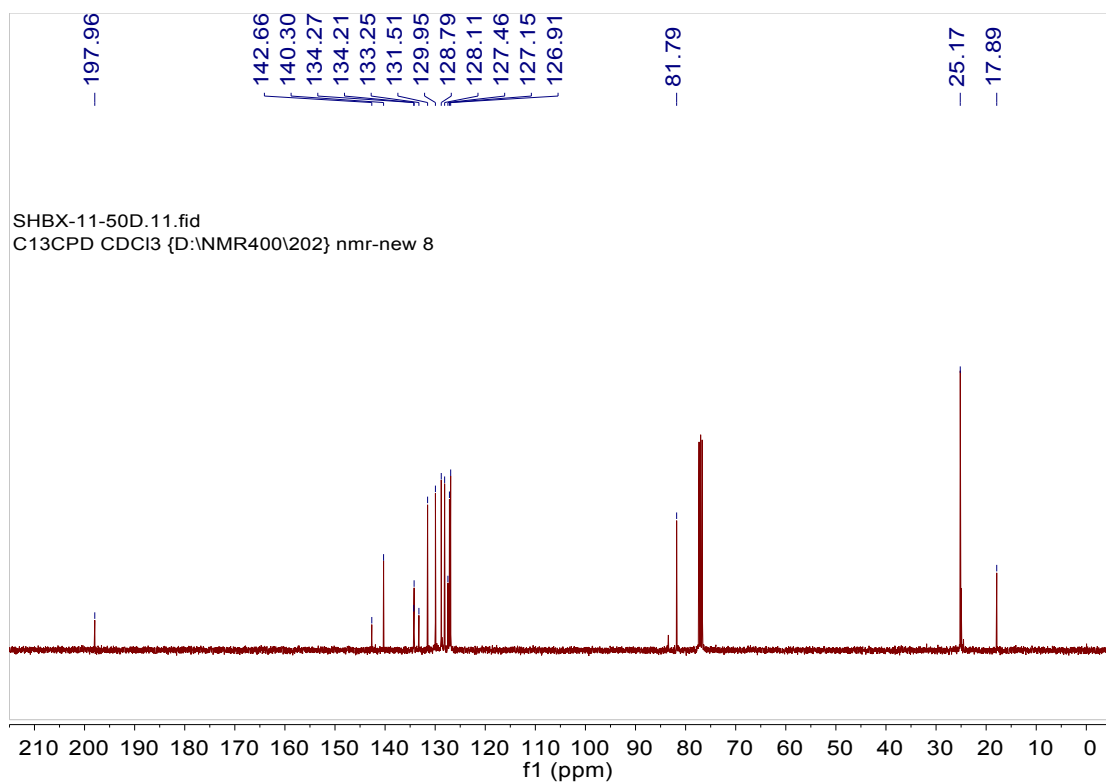

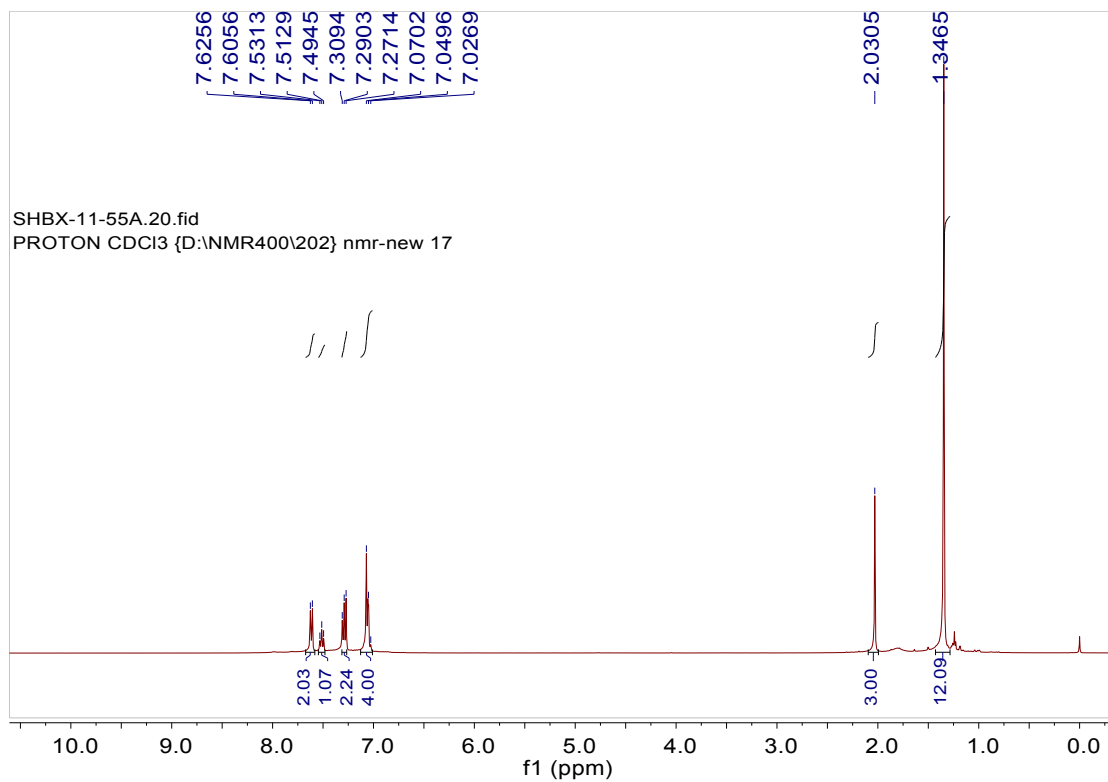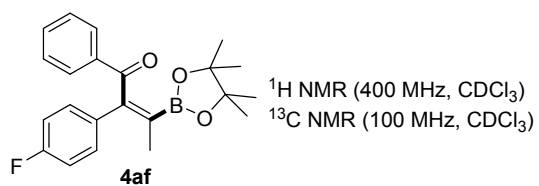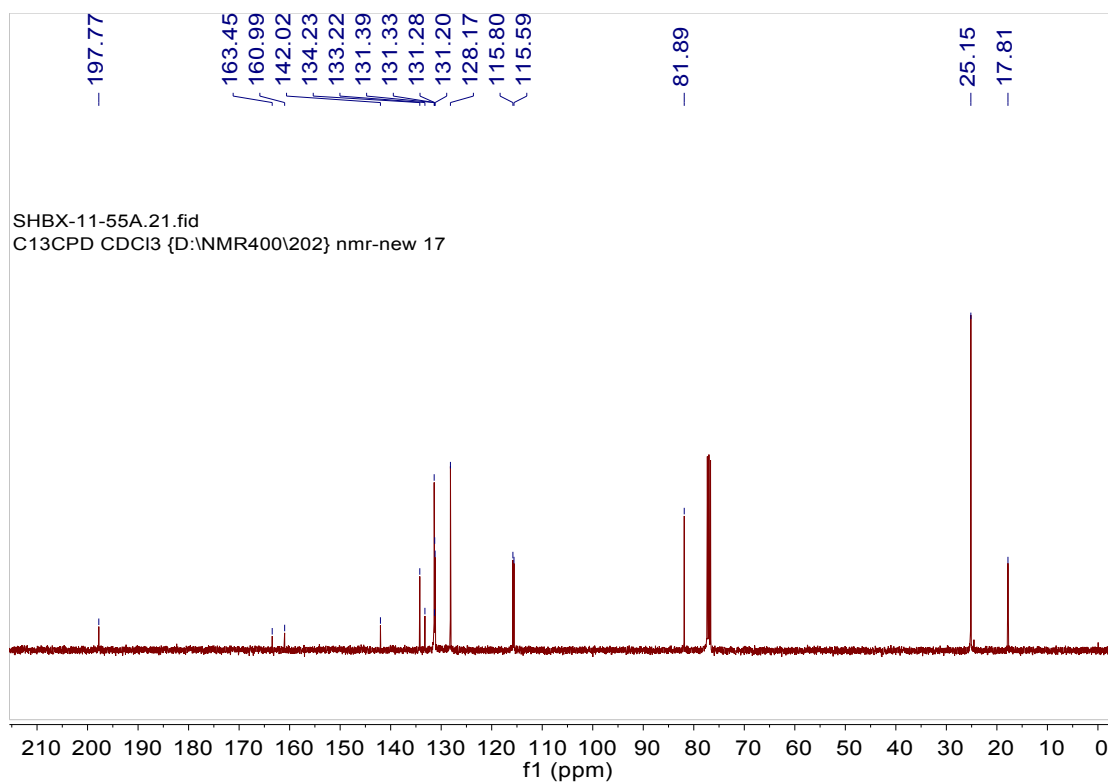

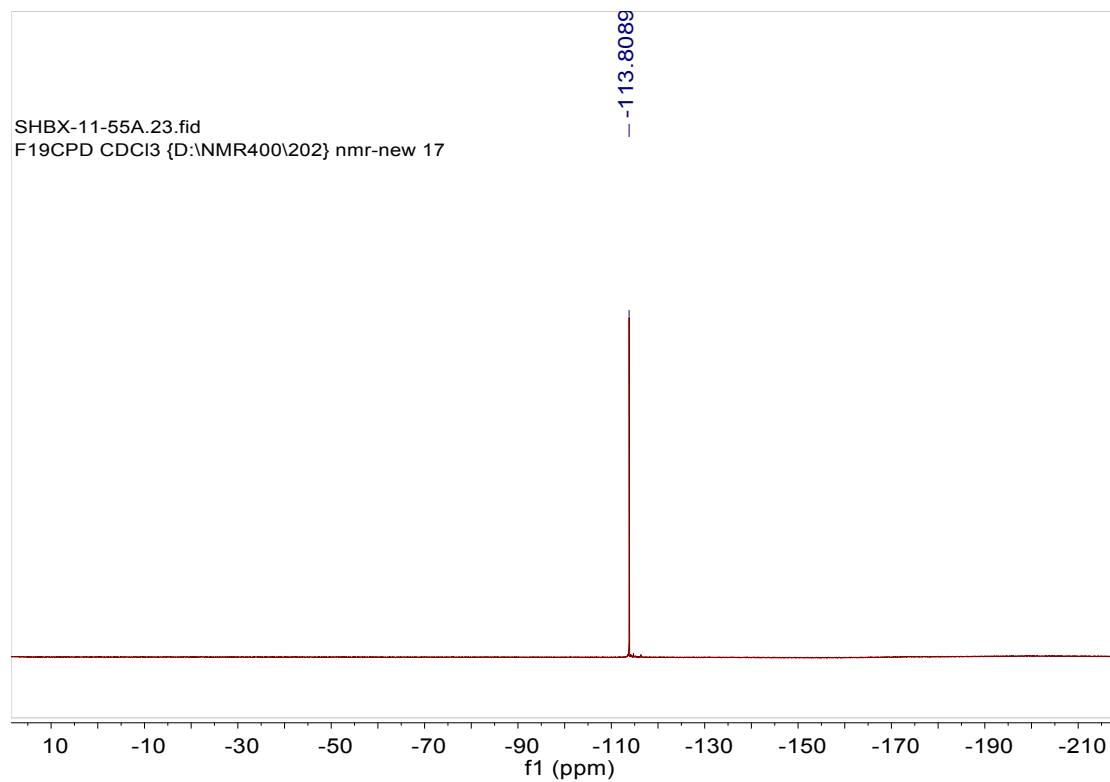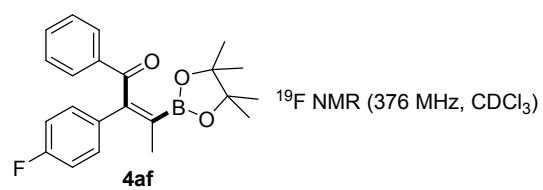

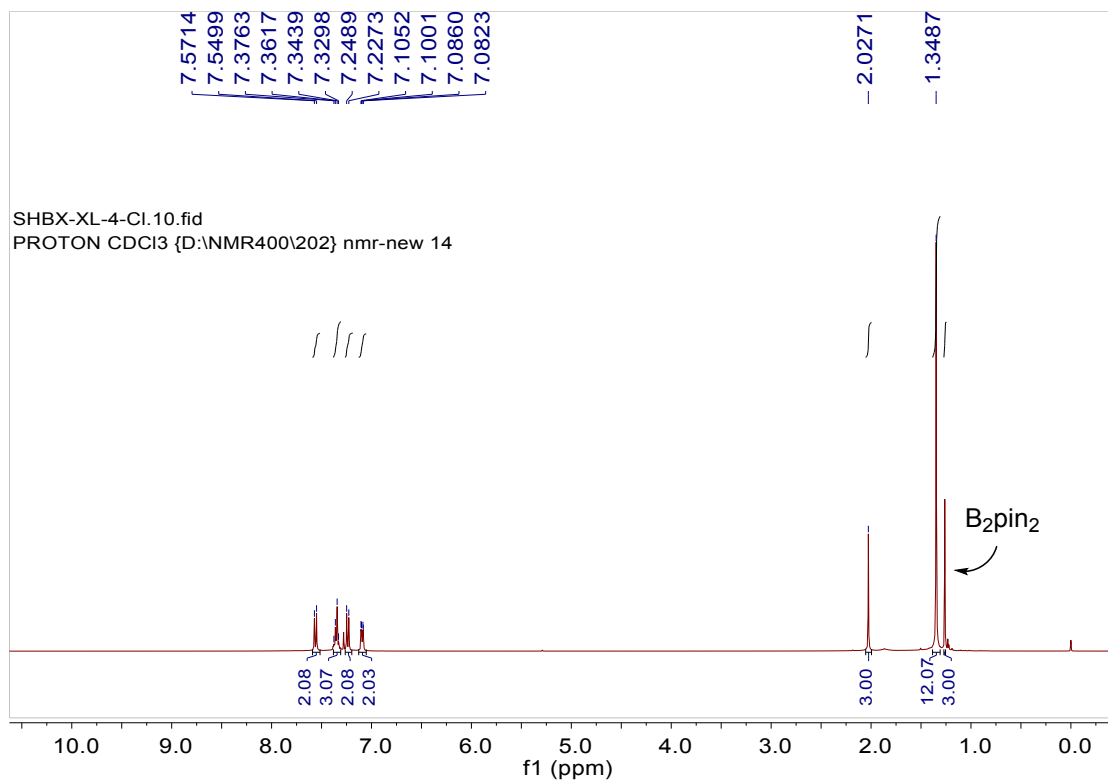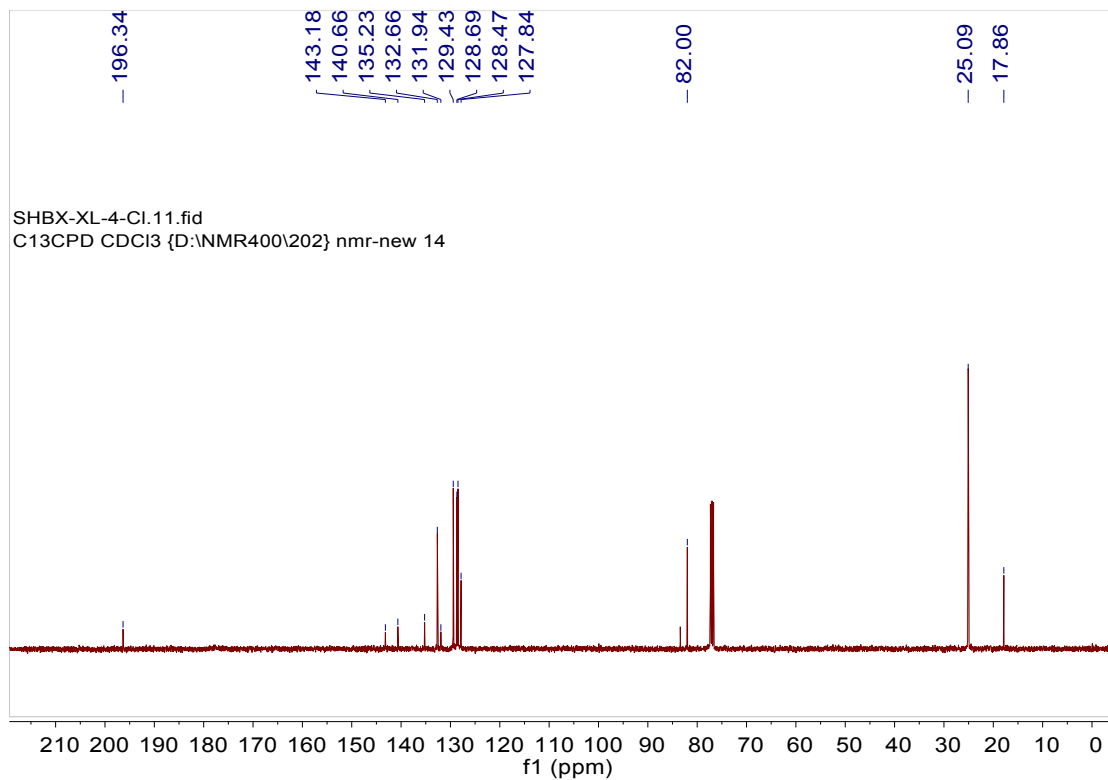

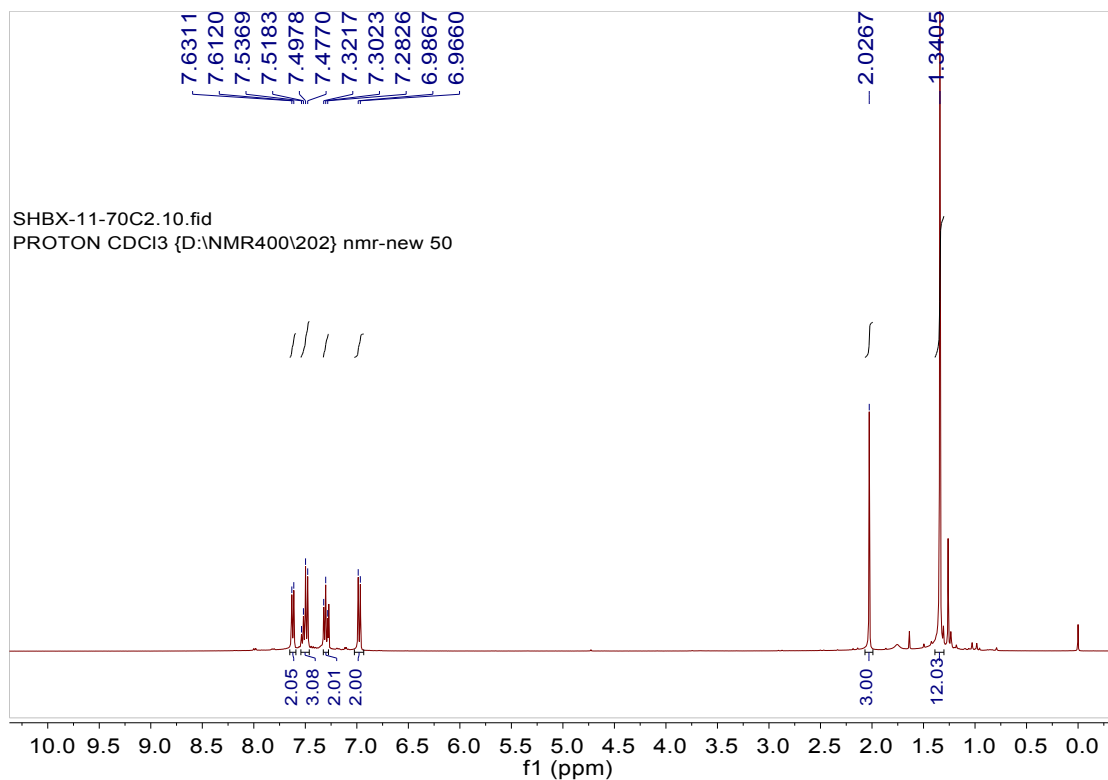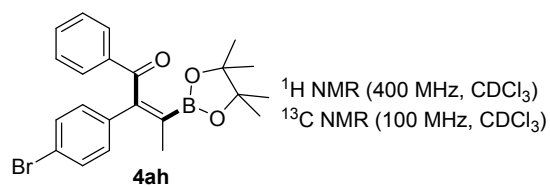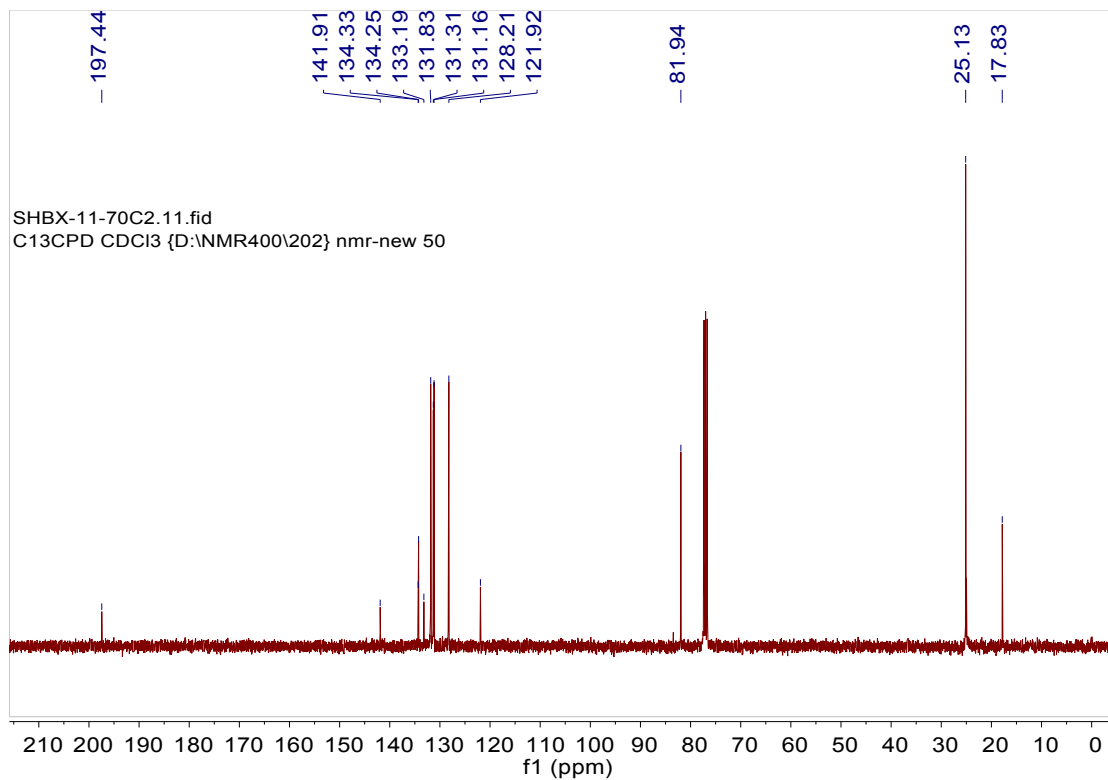

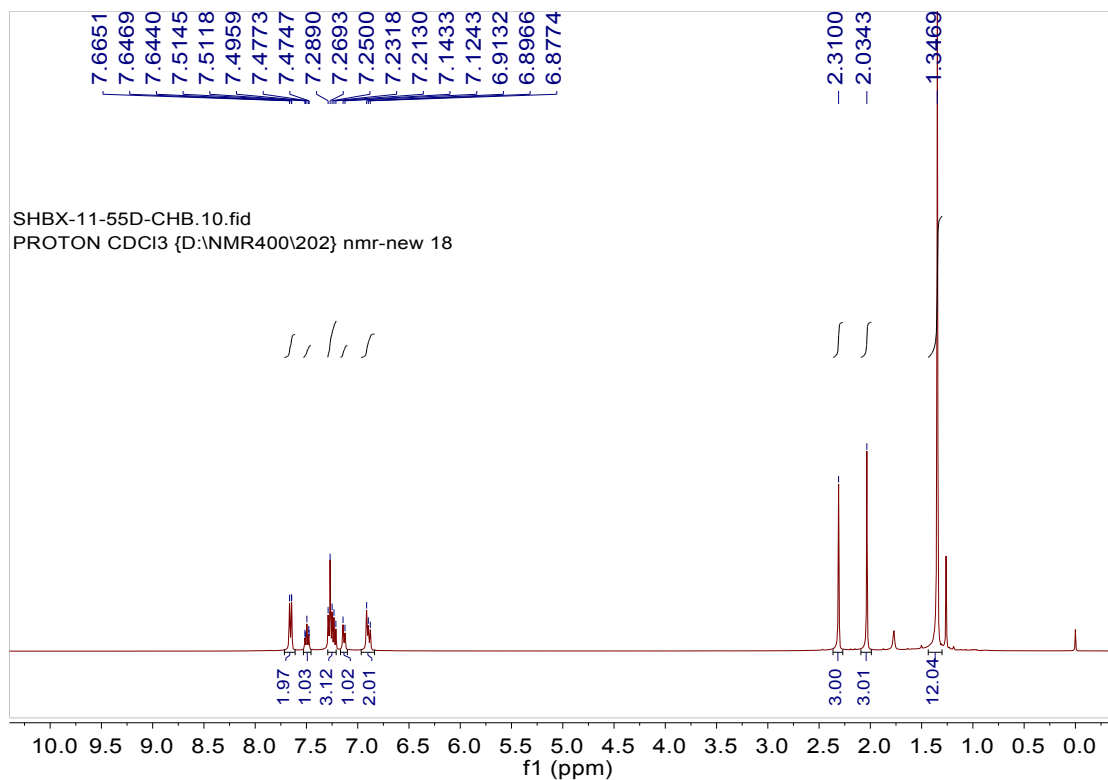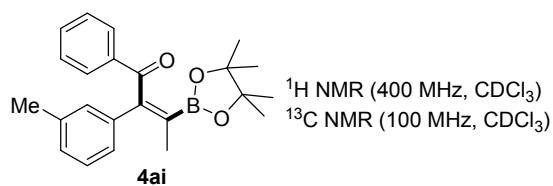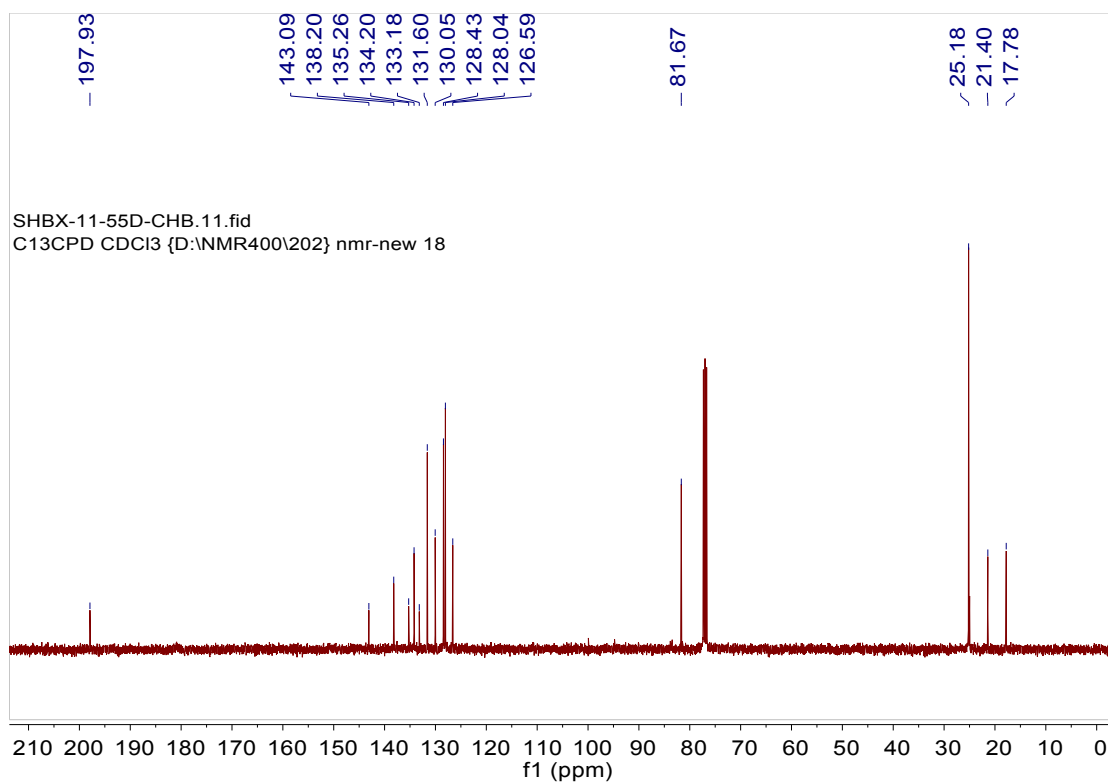

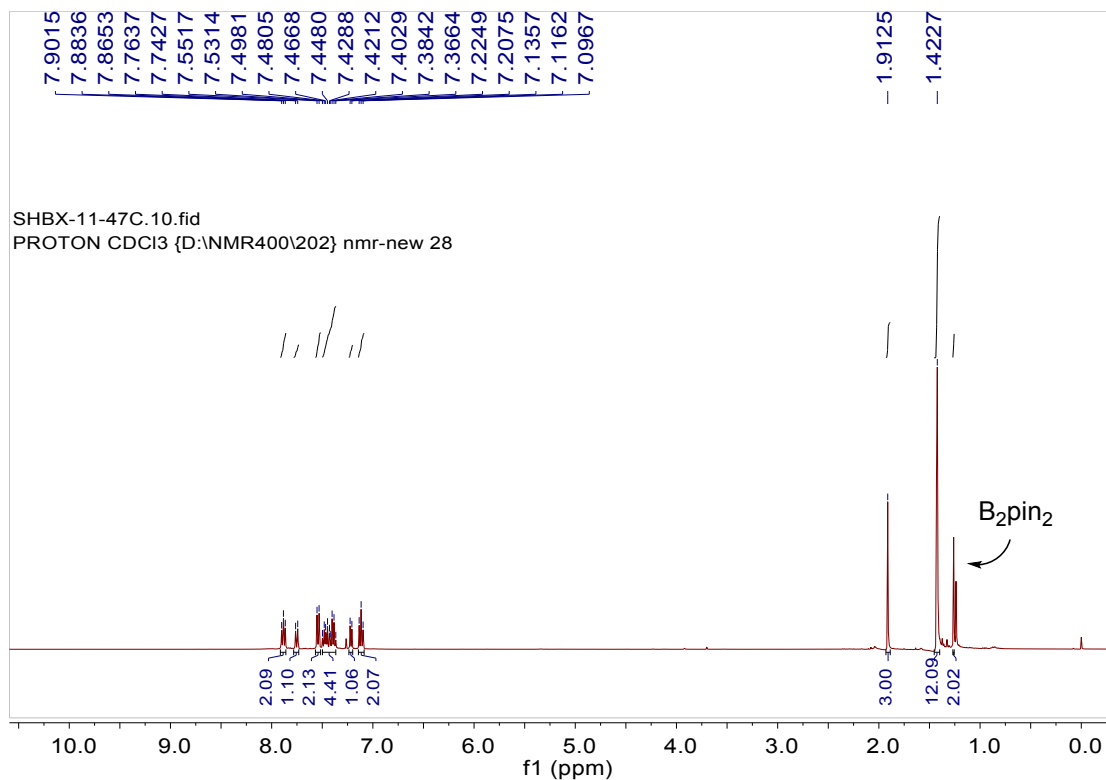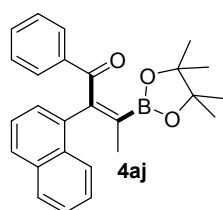

<sup>1</sup>H NMR (400 MHz, CDCl<sub>3</sub>)  
<sup>13</sup>C NMR (100 MHz, CDCl<sub>3</sub>)

B<sub>2</sub>pin<sub>2</sub>  
**2**

**4aj/2 = 12/1**

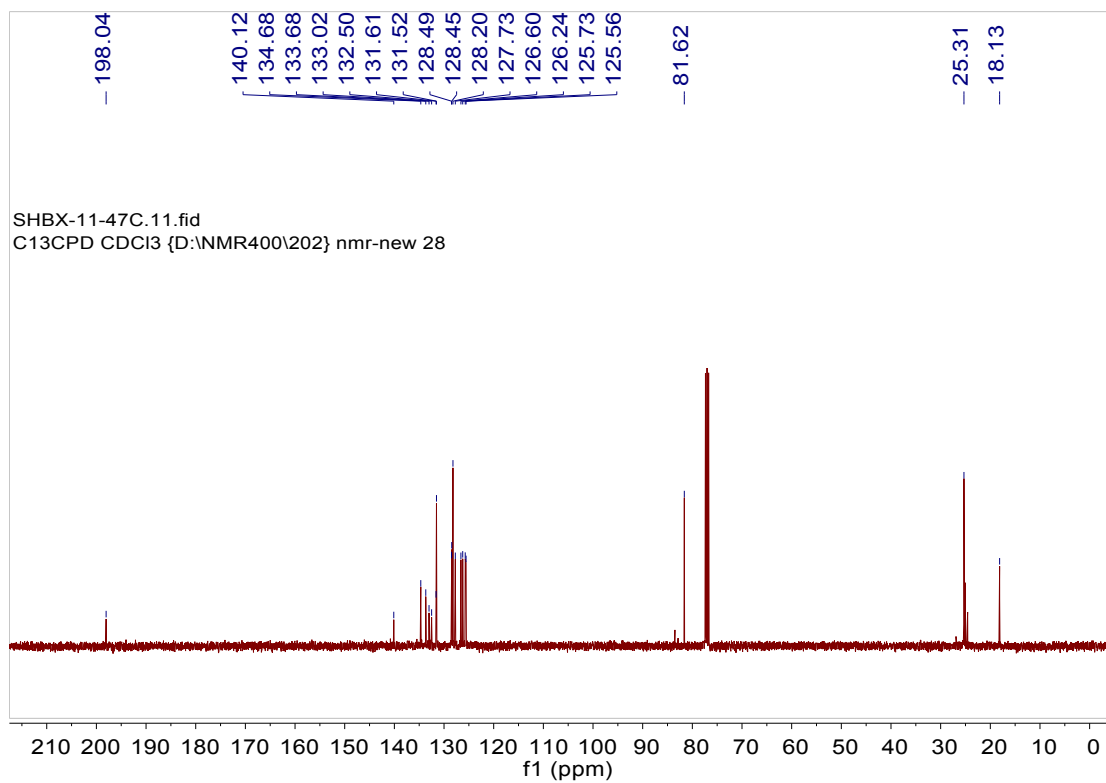

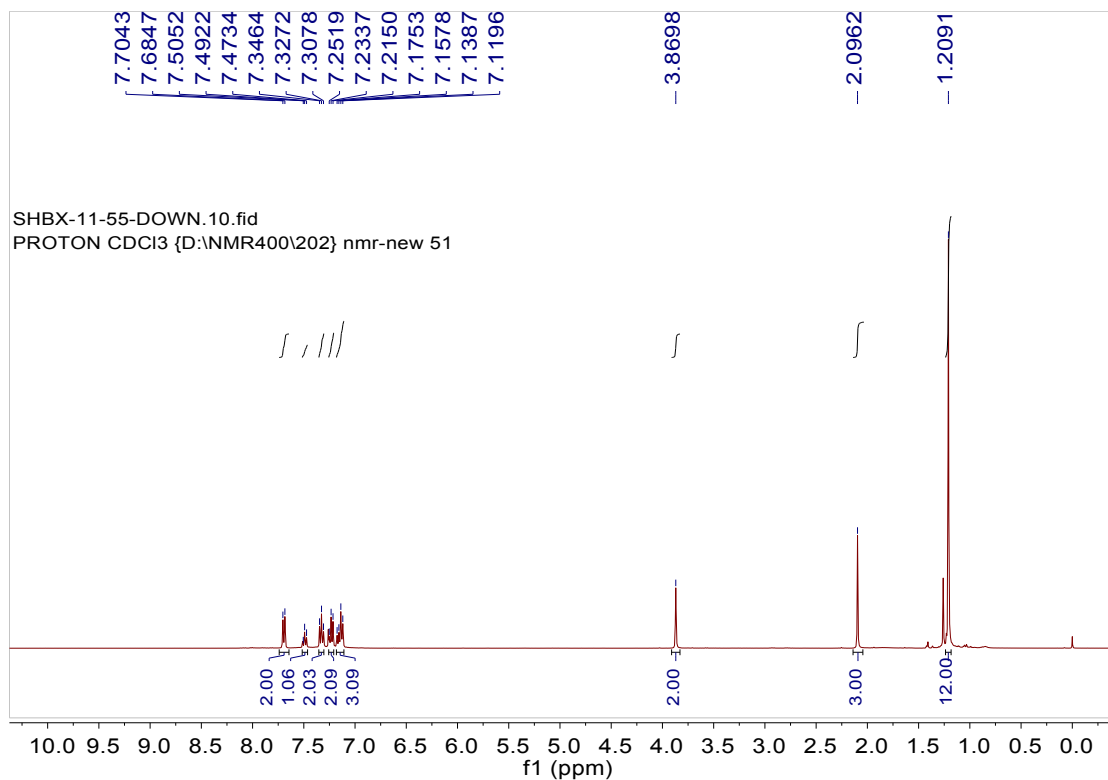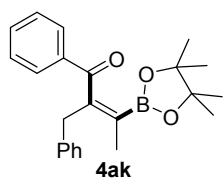

<sup>1</sup>H NMR (400 MHz, CDCl<sub>3</sub>)  
<sup>13</sup>C NMR (100 MHz, CDCl<sub>3</sub>)

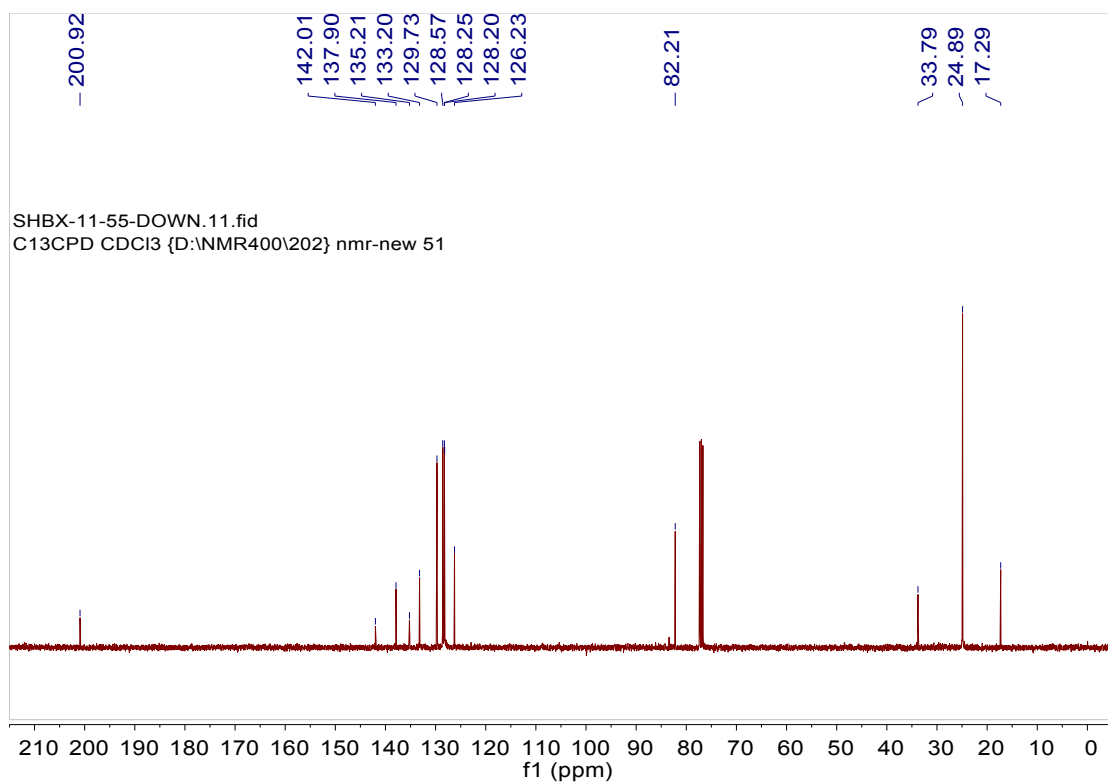



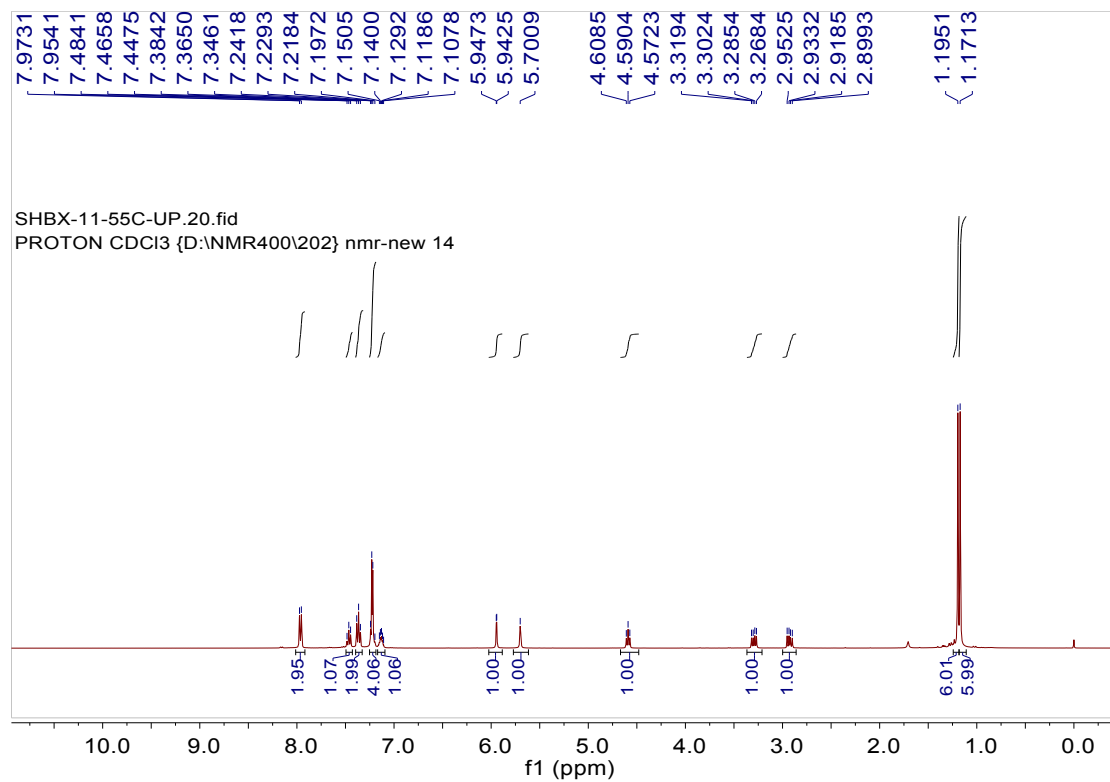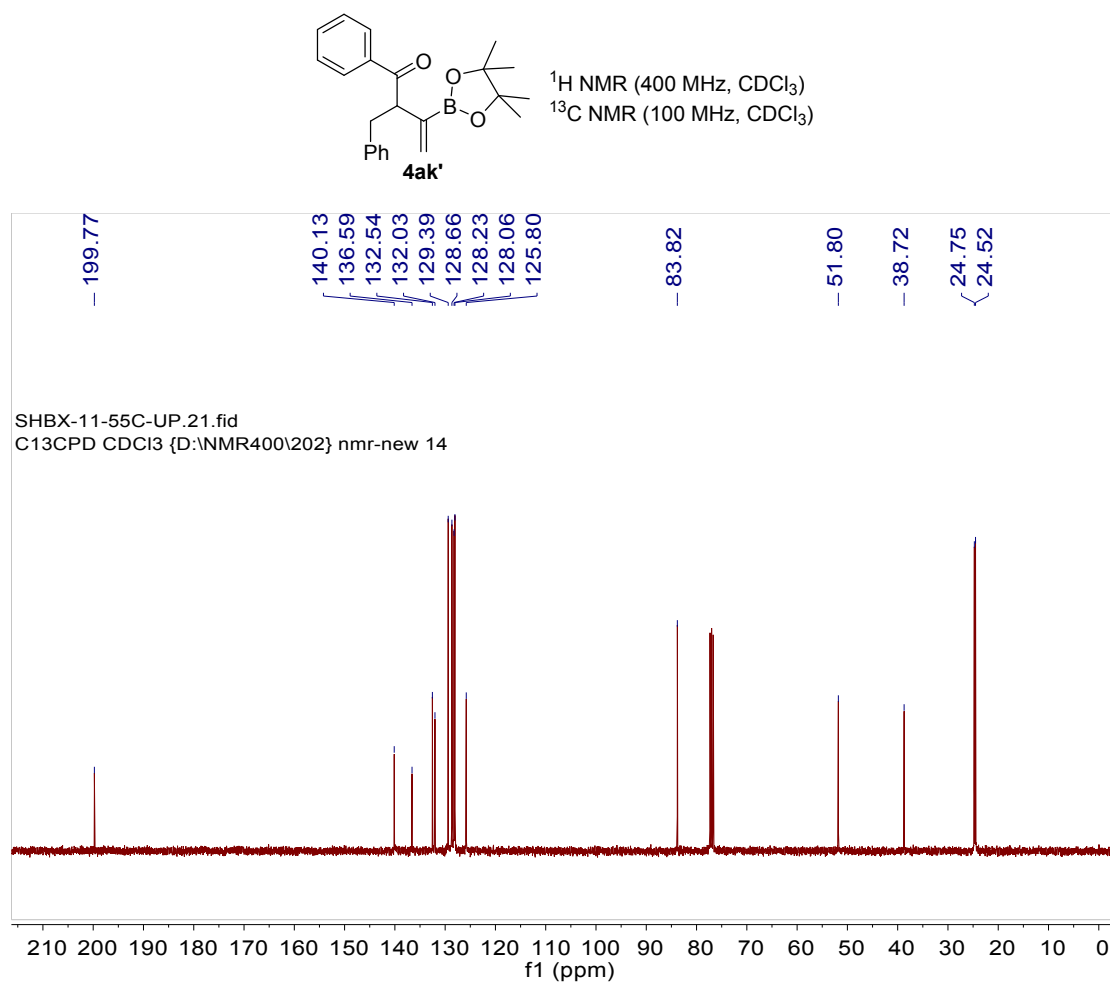

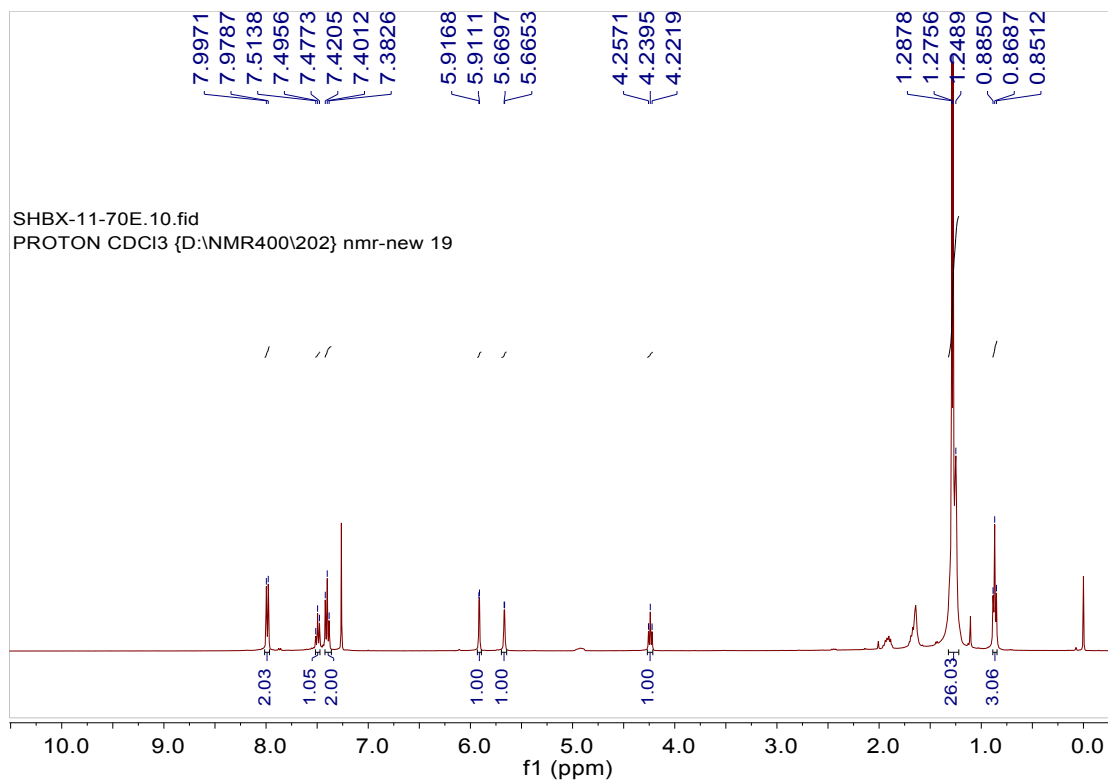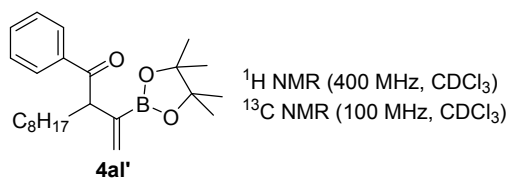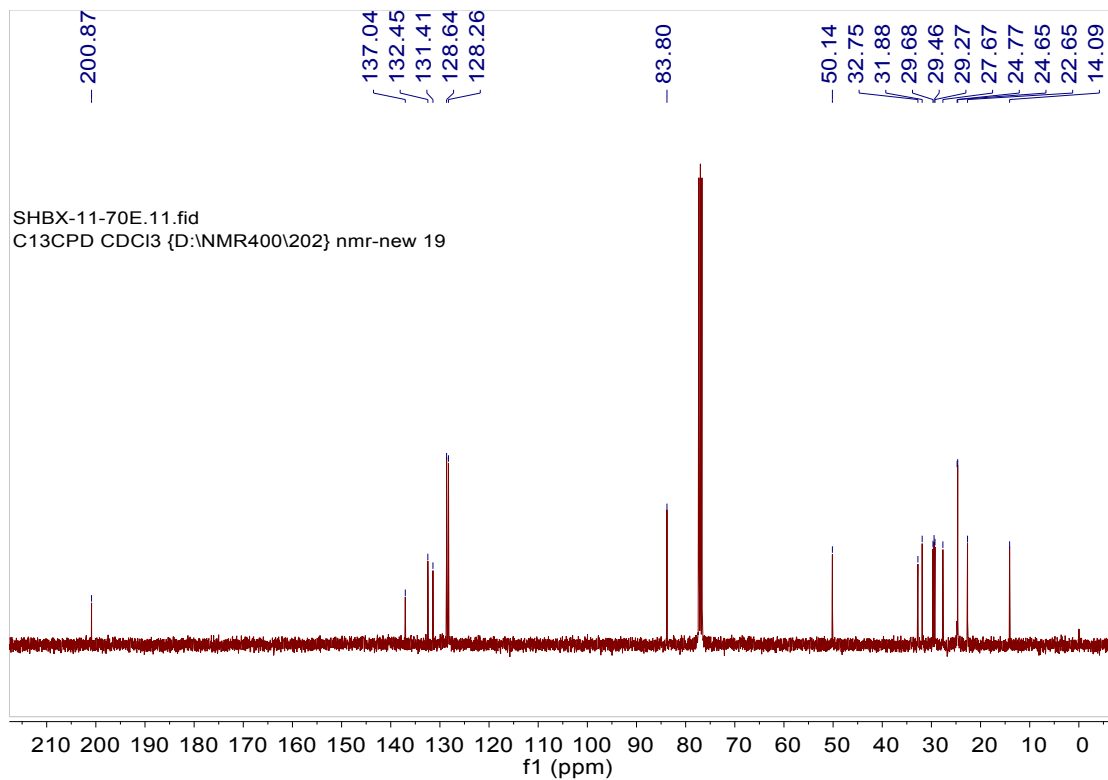

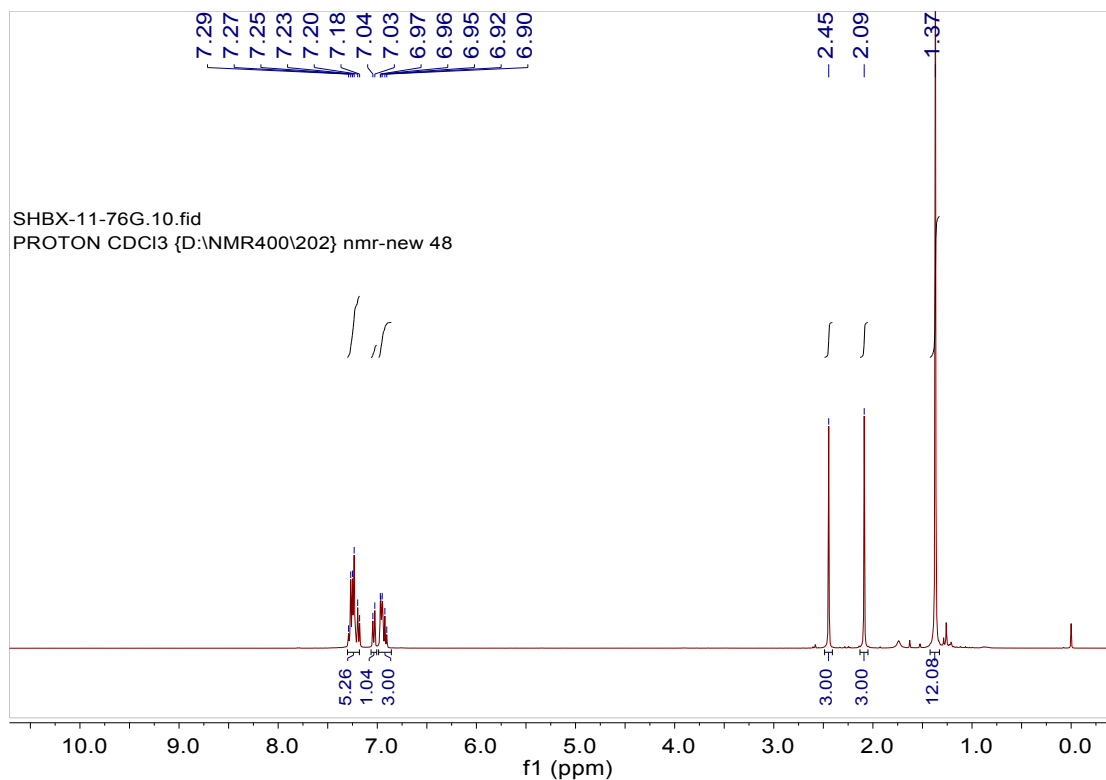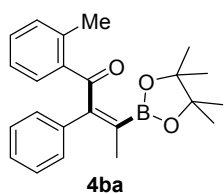

<sup>1</sup>H NMR (400 MHz, CDCl<sub>3</sub>)  
<sup>13</sup>C NMR (100 MHz, CDCl<sub>3</sub>)

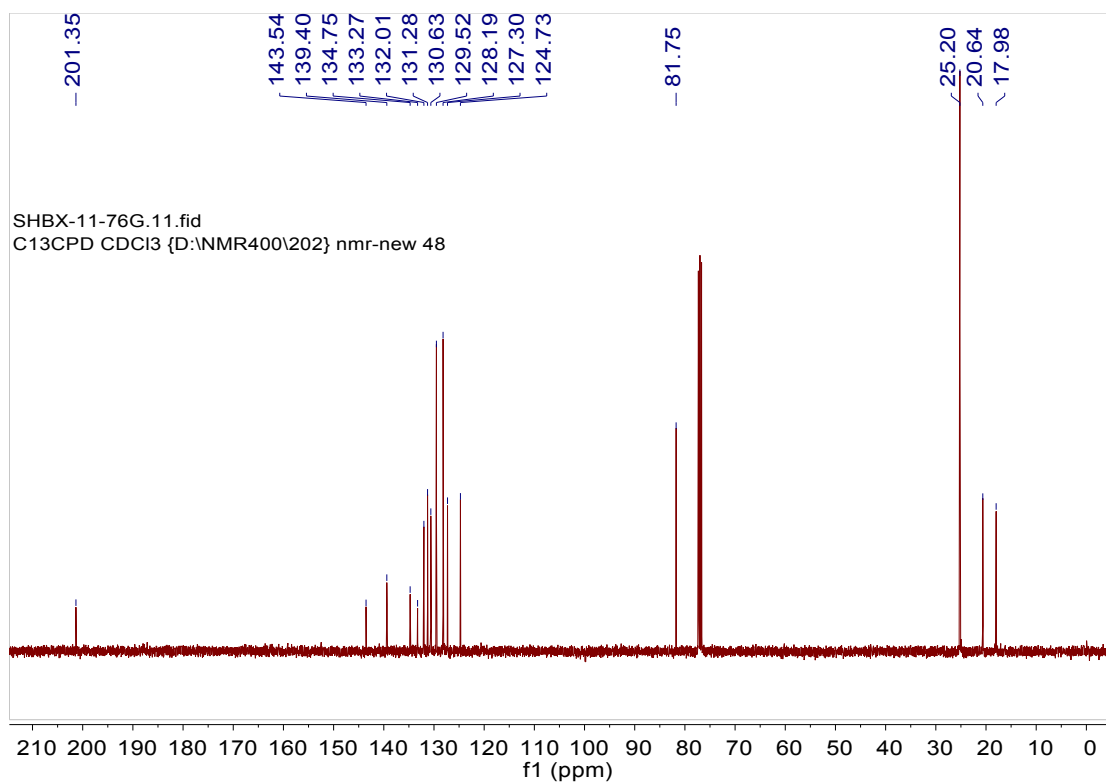

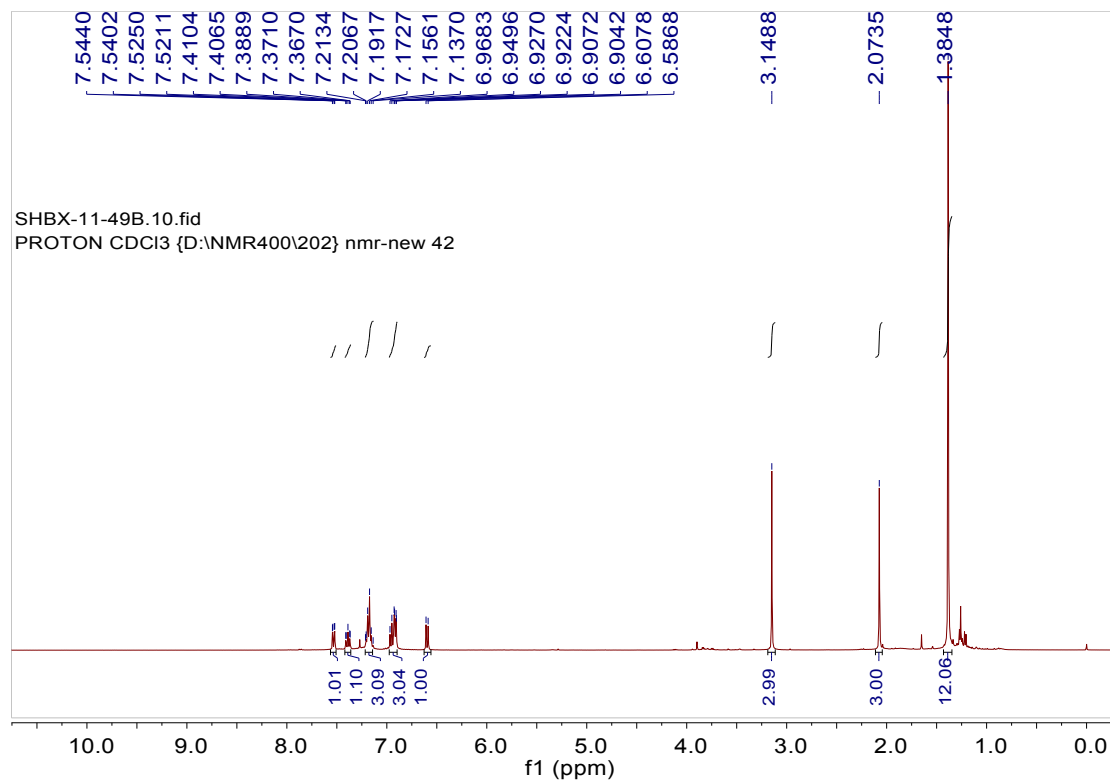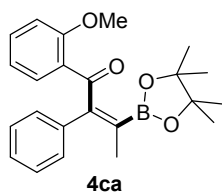

<sup>1</sup>H NMR (400 MHz, CDCl<sub>3</sub>)  
<sup>13</sup>C NMR (100 MHz, CDCl<sub>3</sub>)

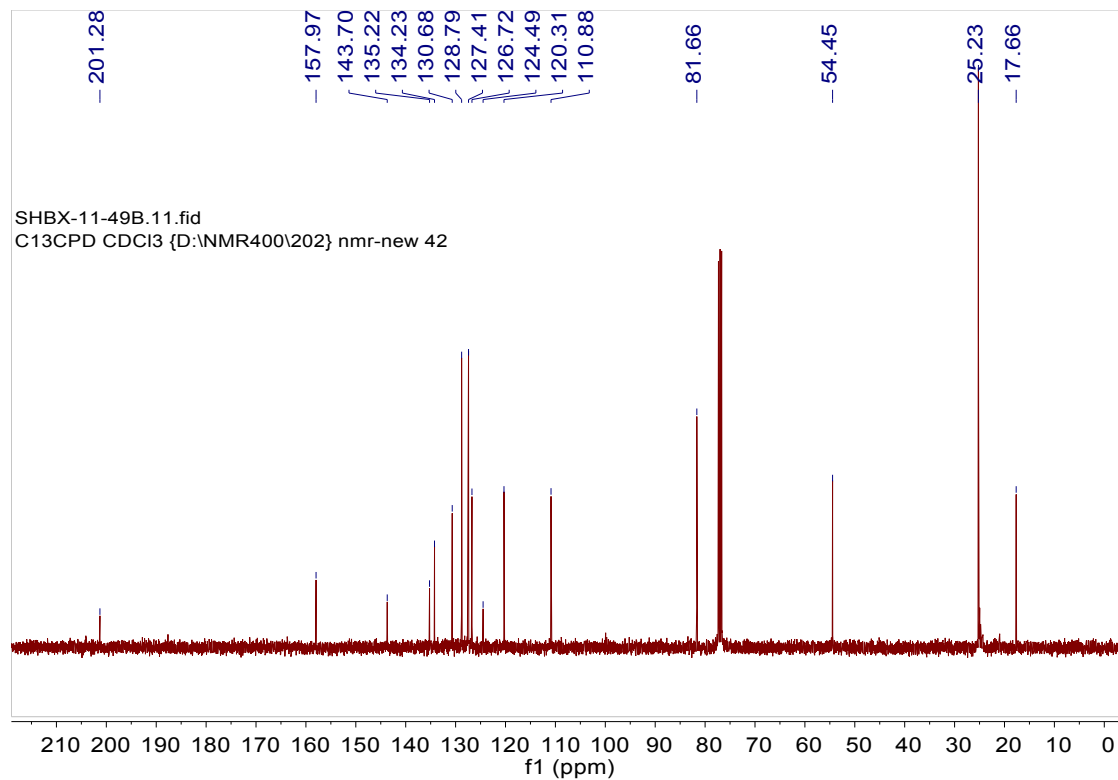

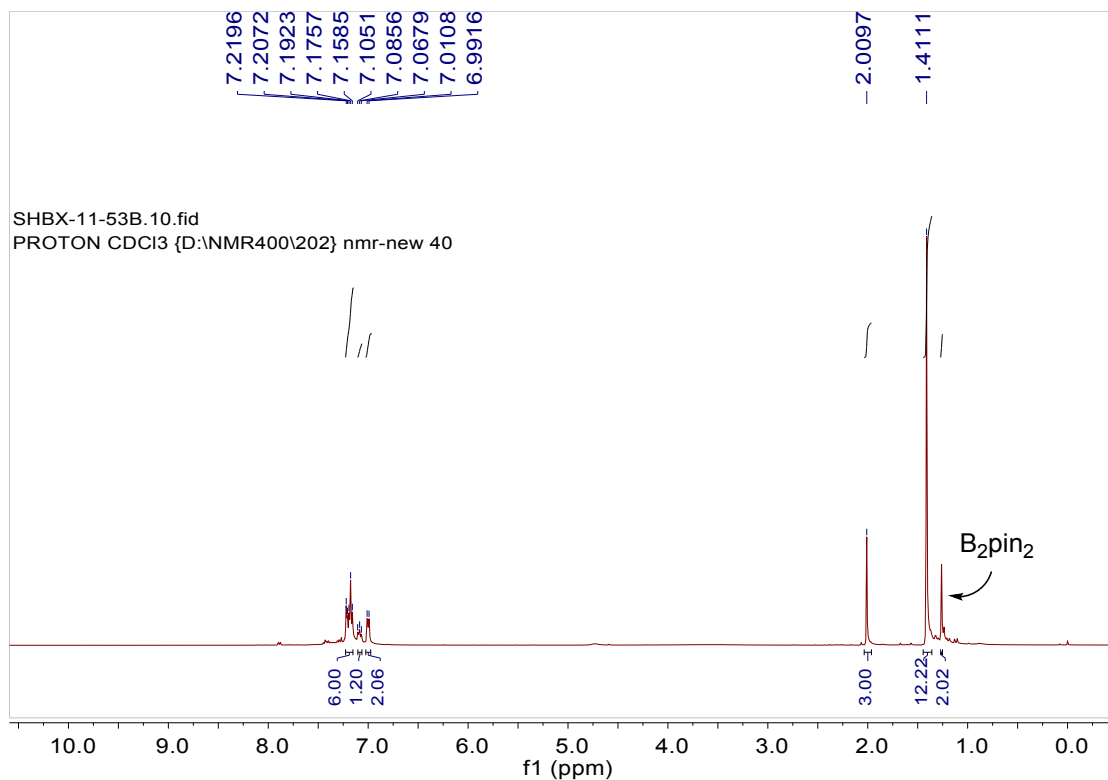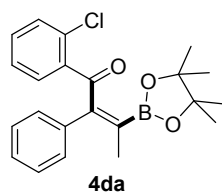

<sup>1</sup>H NMR (400 MHz, CDCl<sub>3</sub>)  
<sup>13</sup>C NMR (100 MHz, CDCl<sub>3</sub>)

B<sub>2</sub>pin<sub>2</sub>  
**2**

**4da/2 = 12/1**

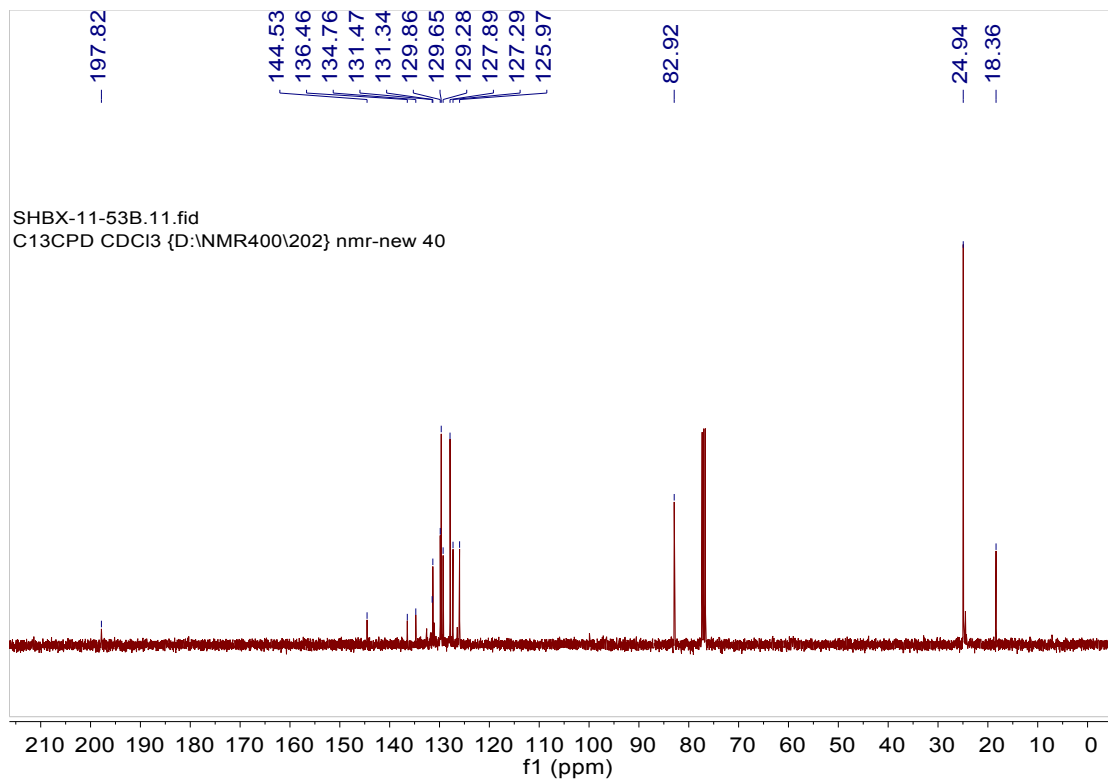

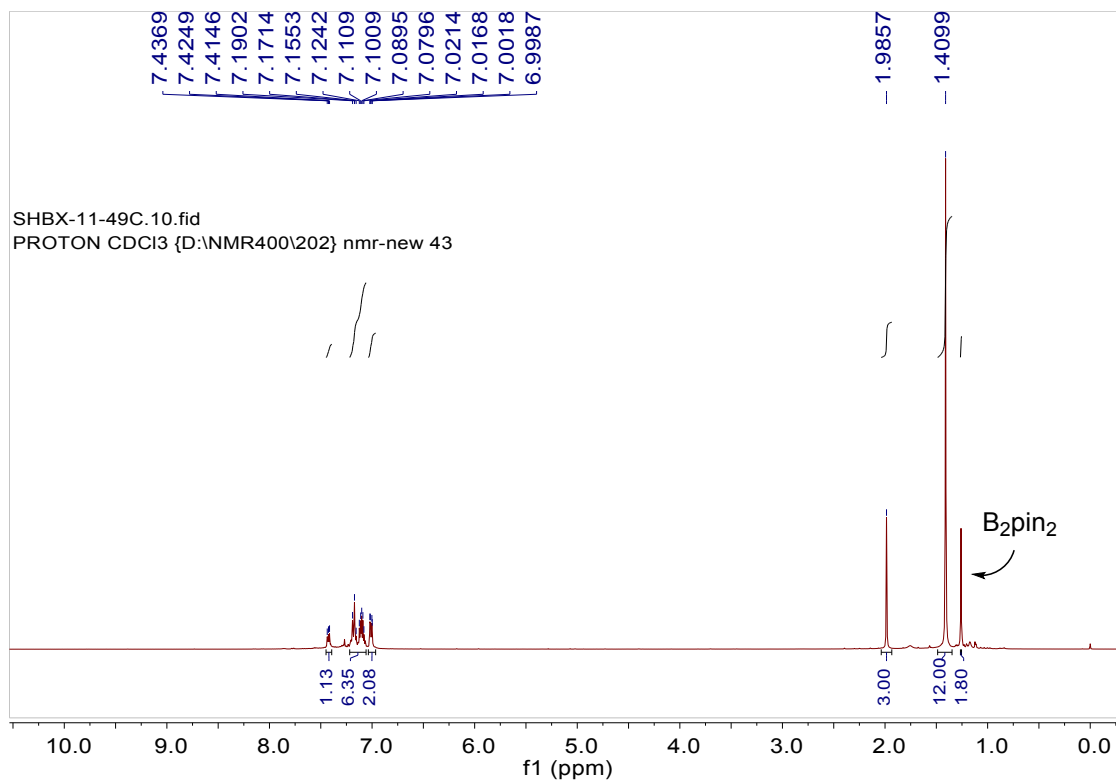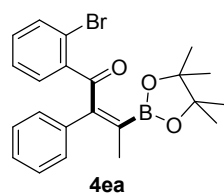

<sup>1</sup>H NMR (400 MHz, CDCl<sub>3</sub>)  
<sup>13</sup>C NMR (100 MHz, CDCl<sub>3</sub>)

B<sub>2</sub>pin<sub>2</sub>  
 2

4ea/2 = 13/1

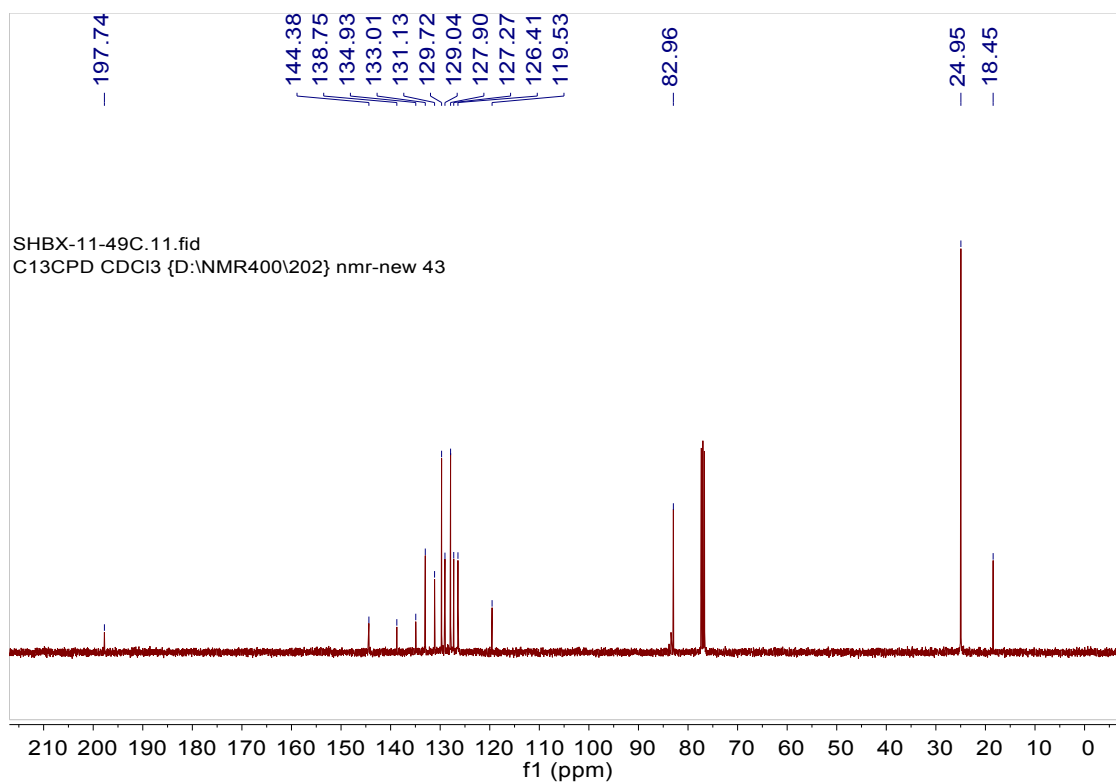

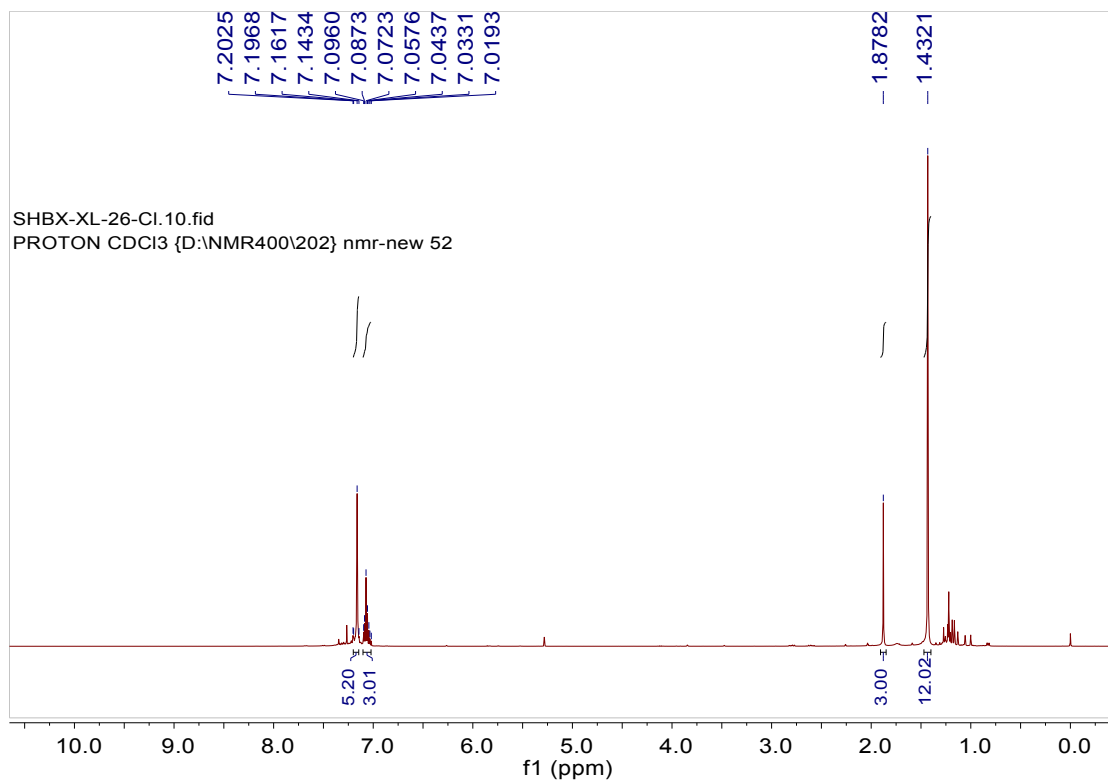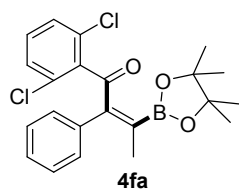

<sup>1</sup>H NMR (400 MHz, CDCl<sub>3</sub>)  
<sup>13</sup>C NMR (100 MHz, CDCl<sub>3</sub>)

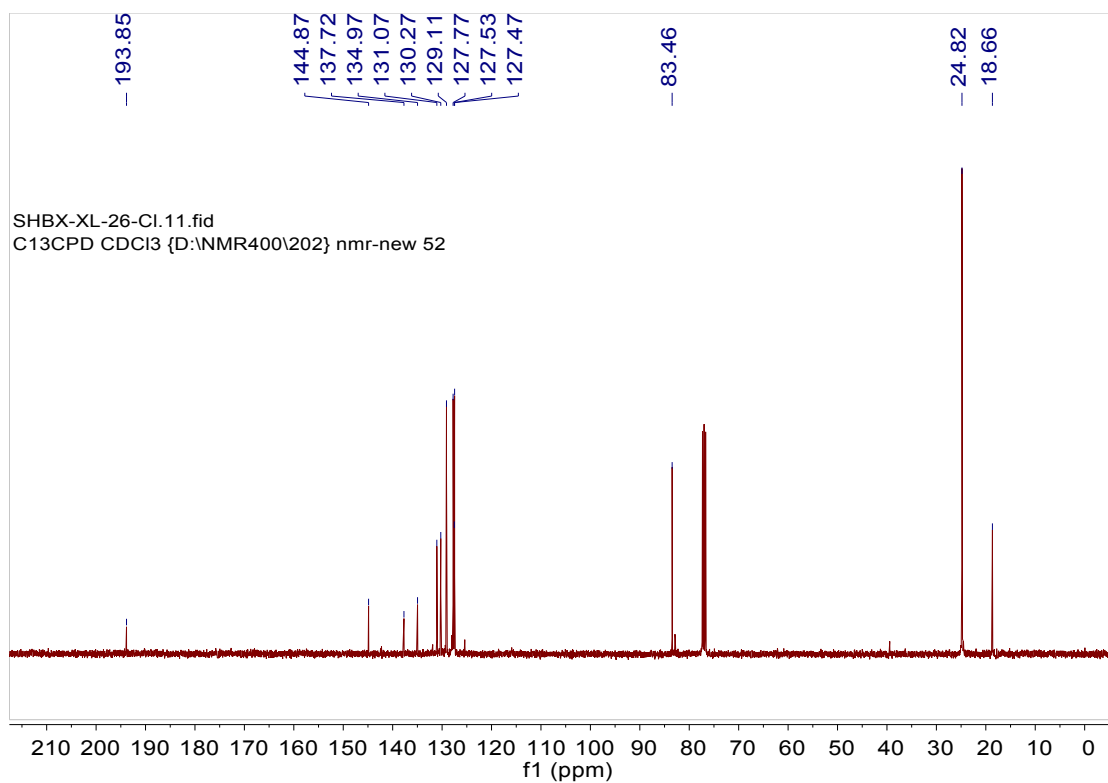

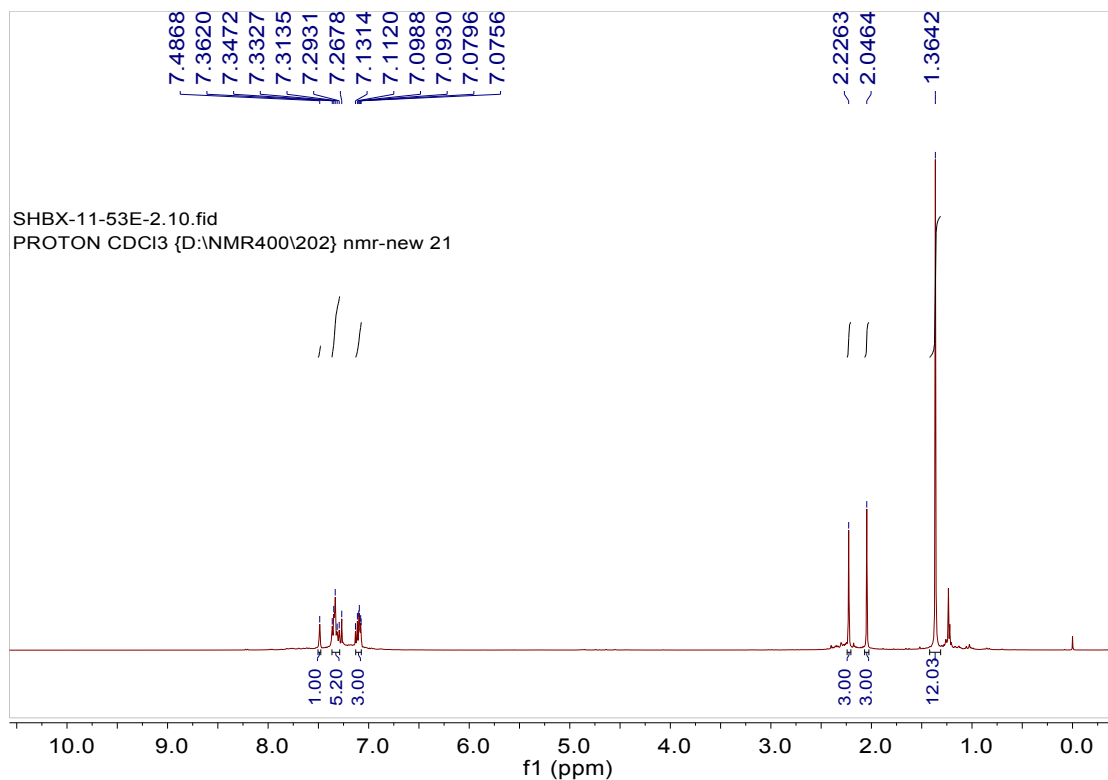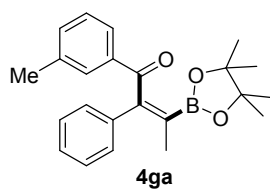

<sup>1</sup>H NMR (400 MHz, CDCl<sub>3</sub>)  
<sup>13</sup>C NMR (100 MHz, CDCl<sub>3</sub>)

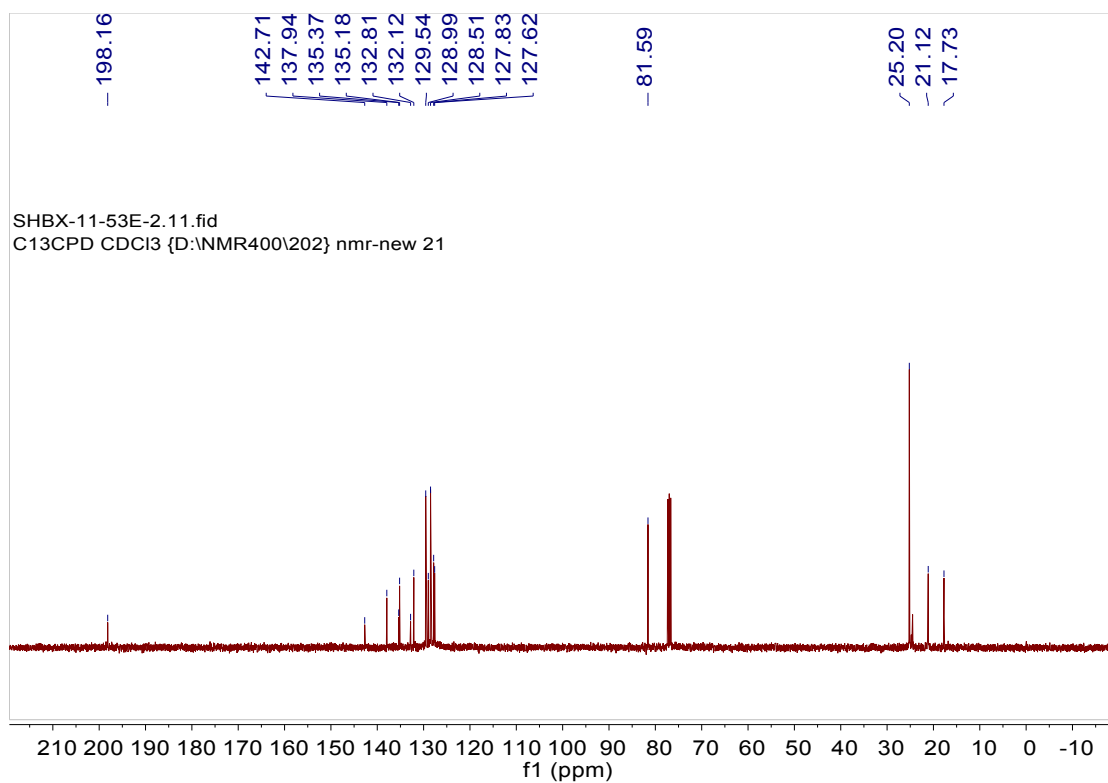



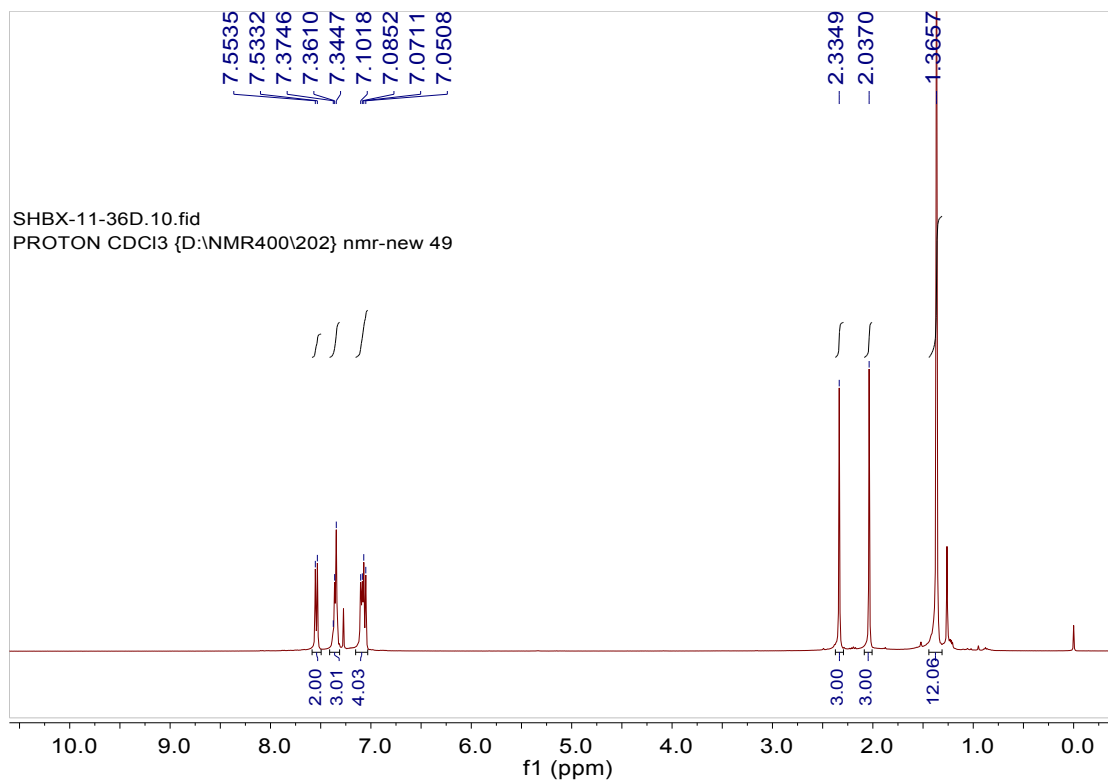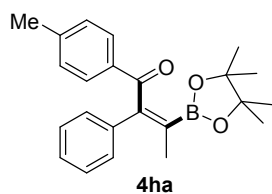

<sup>1</sup>H NMR (400 MHz, CDCl<sub>3</sub>)  
<sup>13</sup>C NMR (100 MHz, CDCl<sub>3</sub>)

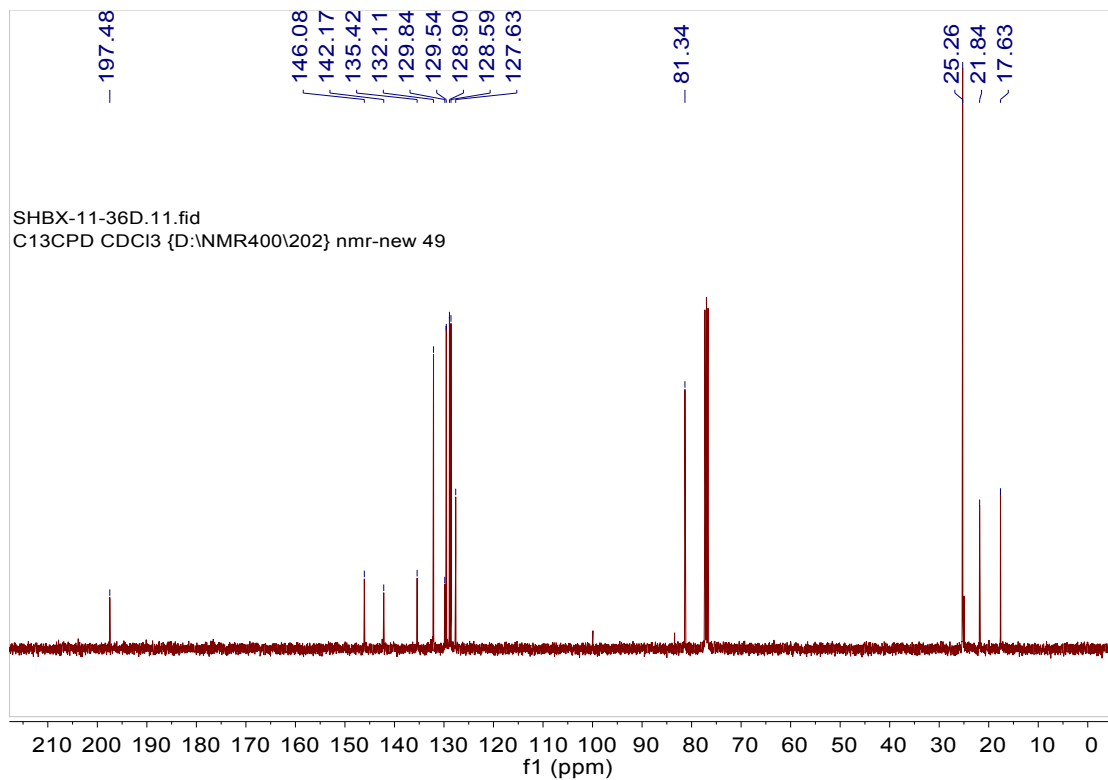

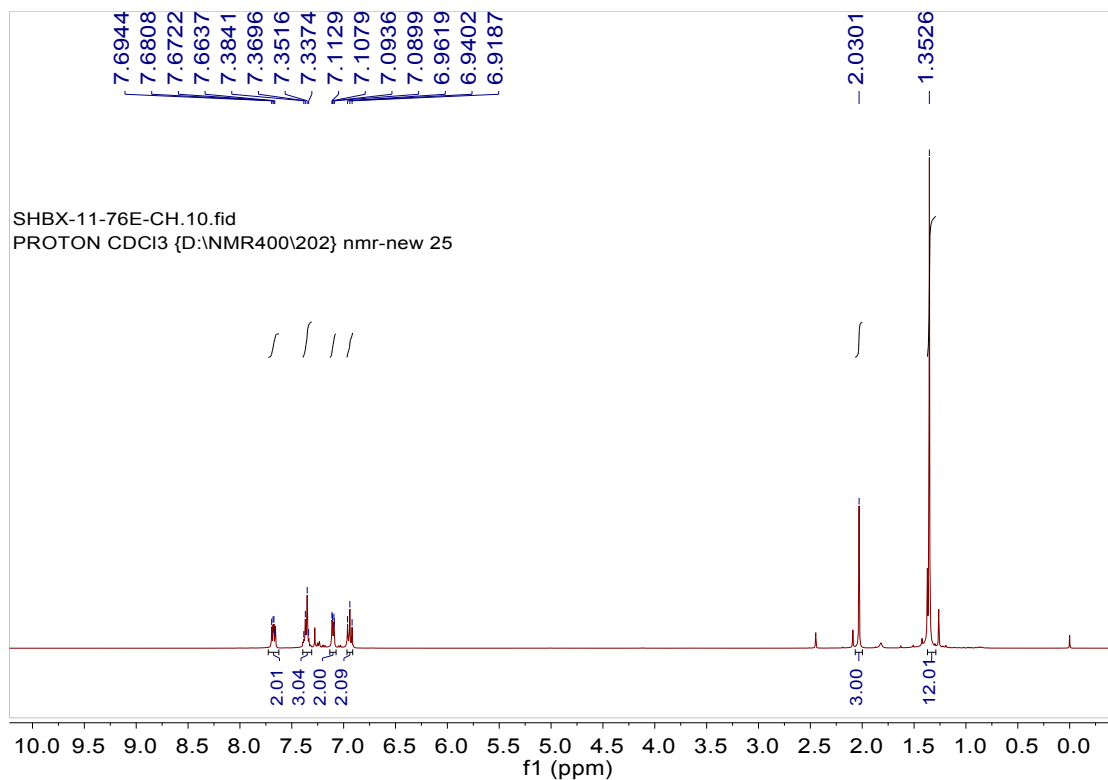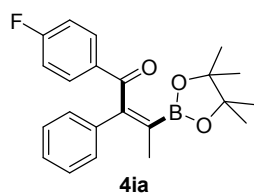

<sup>1</sup>H NMR (400 MHz, CDCl<sub>3</sub>)  
<sup>13</sup>C NMR (100 MHz, CDCl<sub>3</sub>)

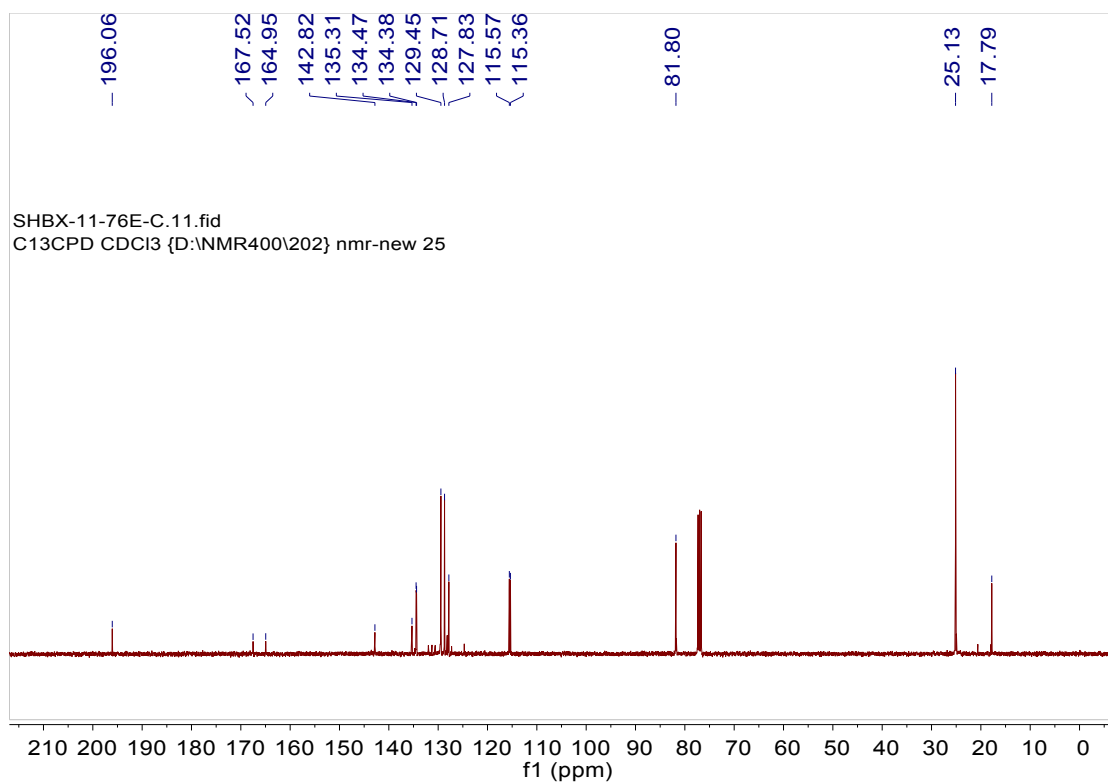

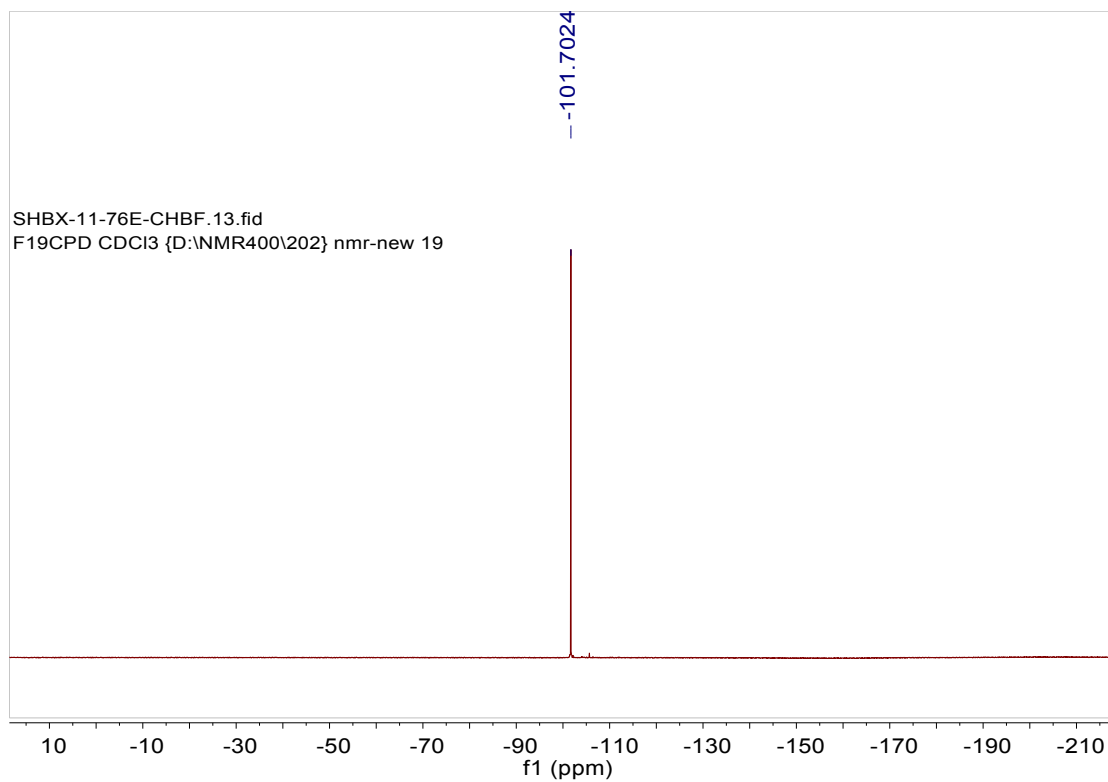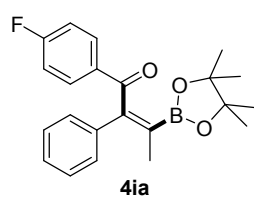

<sup>19</sup>F NMR (376 MHz, CDCl<sub>3</sub>)

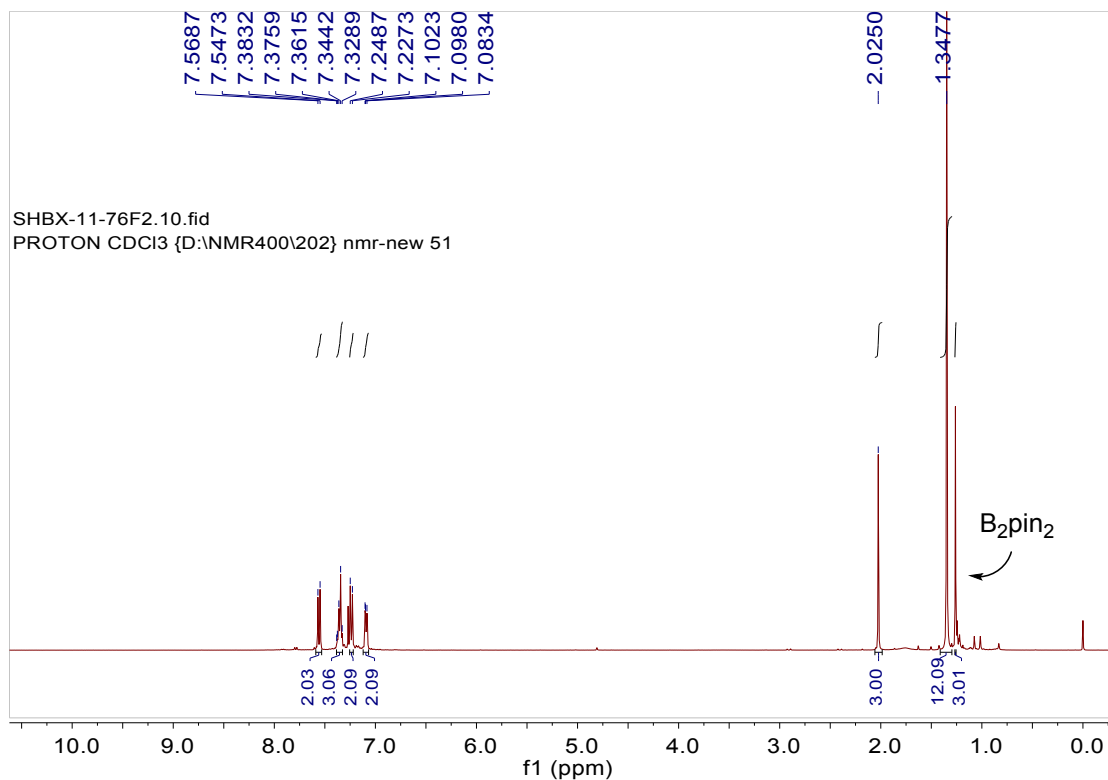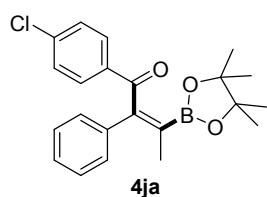

<sup>1</sup>H NMR (400 MHz, CDCl<sub>3</sub>)  
<sup>13</sup>C NMR (100 MHz, CDCl<sub>3</sub>)

B<sub>2</sub>pin<sub>2</sub>  
**2**

**4ja/2 = 8/1**

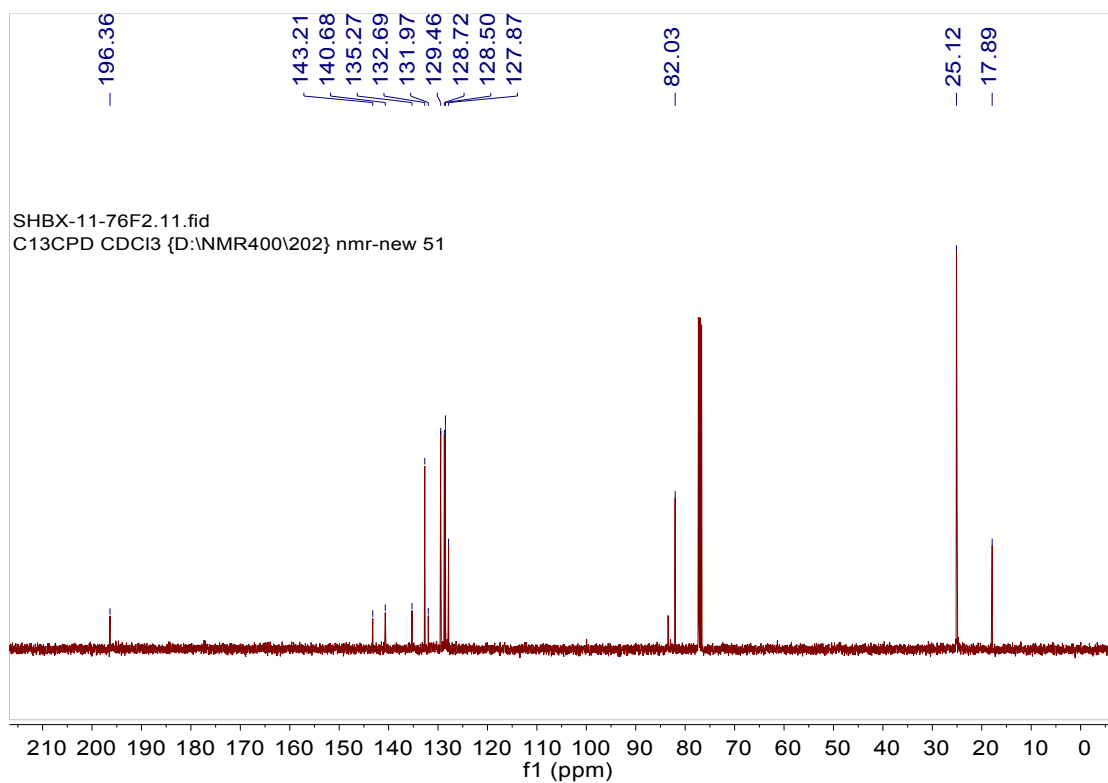

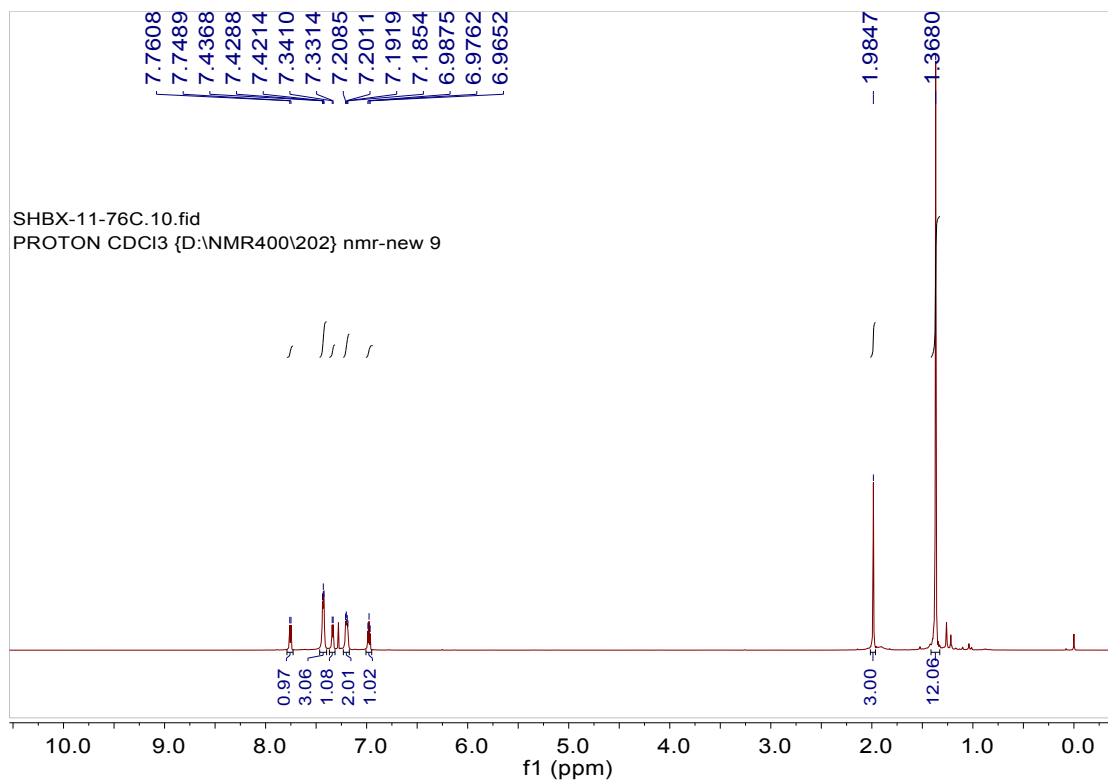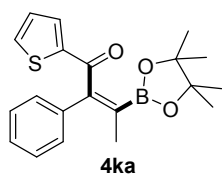

<sup>1</sup>H NMR (400 MHz, CDCl<sub>3</sub>)  
<sup>13</sup>C NMR (100 MHz, CDCl<sub>3</sub>)

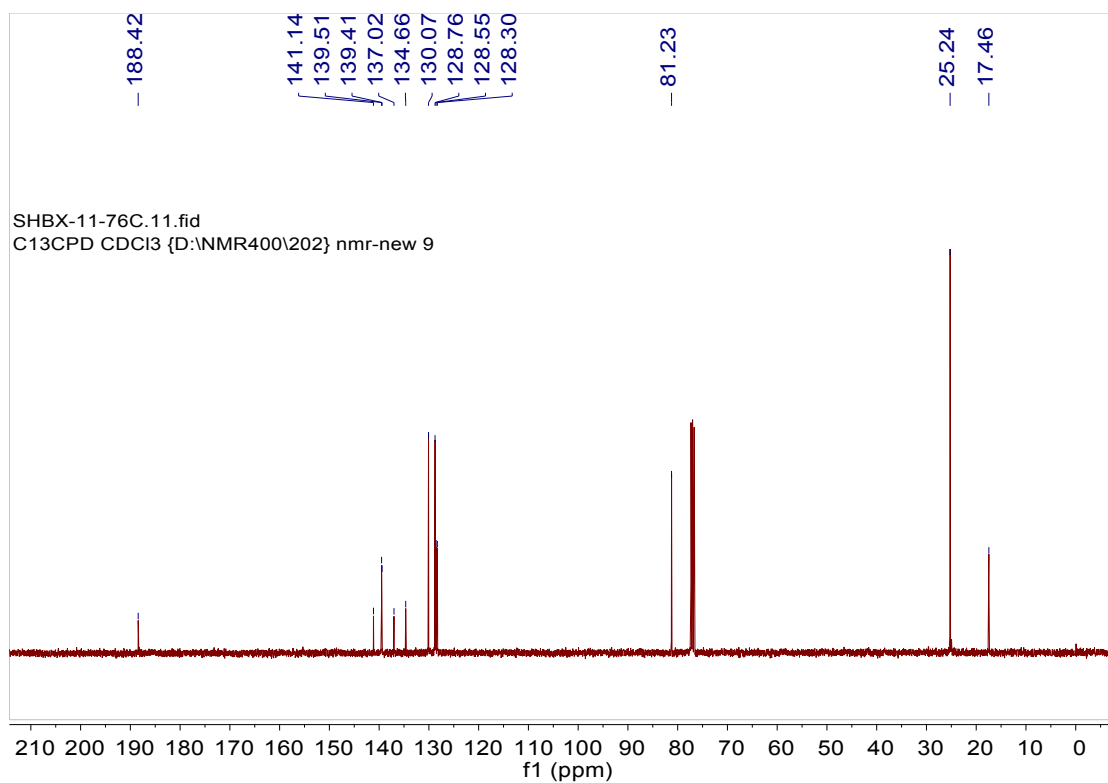

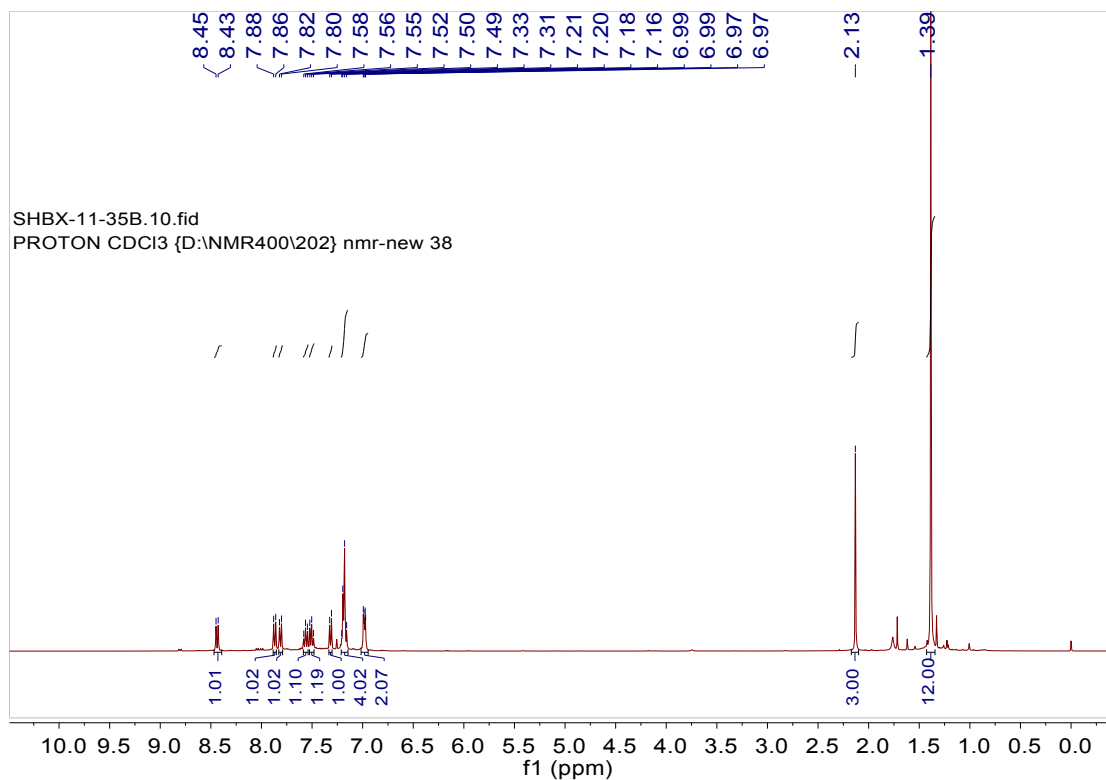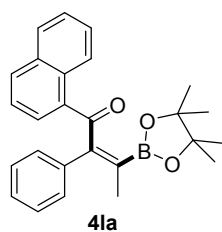

<sup>1</sup>H NMR (400 MHz, CDCl<sub>3</sub>)  
<sup>13</sup>C NMR (100 MHz, CDCl<sub>3</sub>)

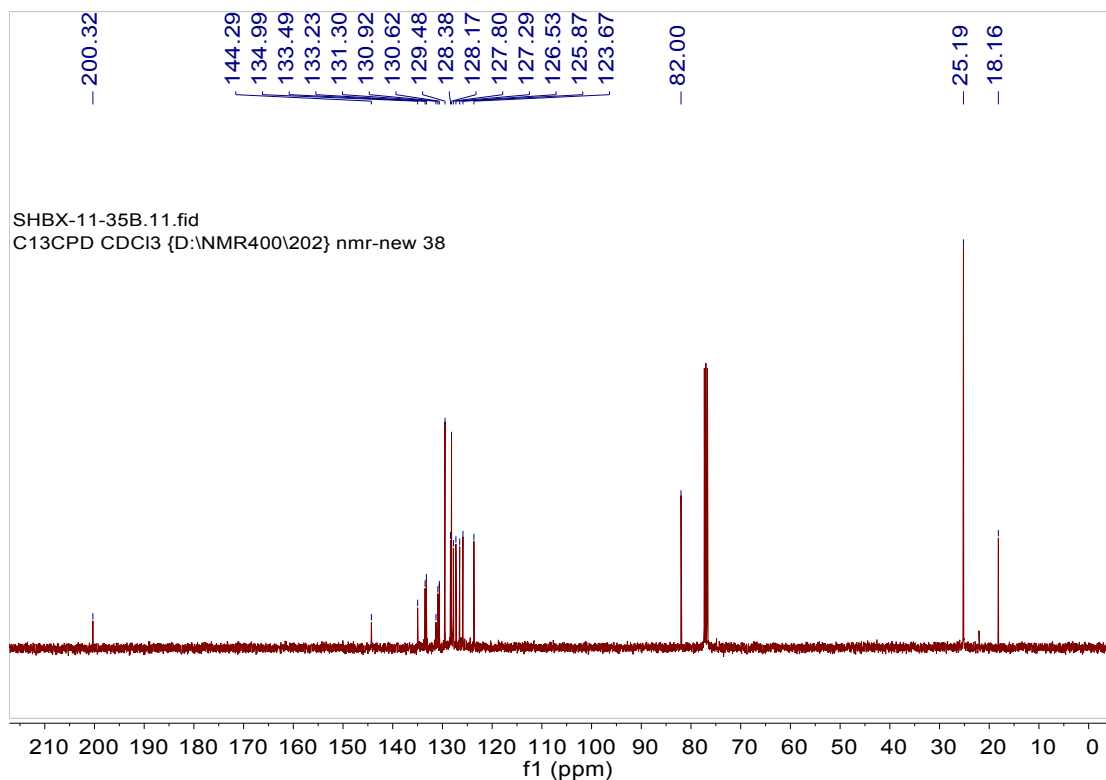

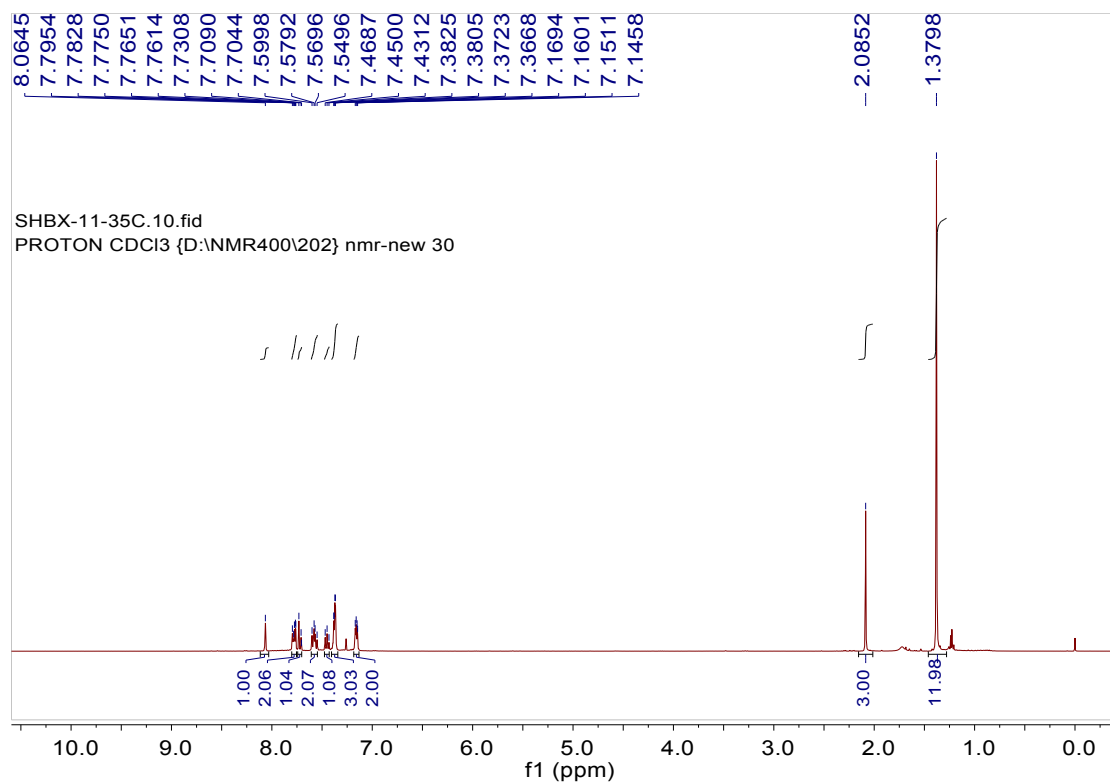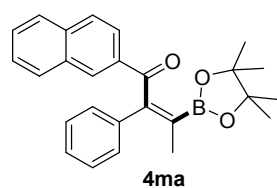

<sup>1</sup>H NMR (400 MHz, CDCl<sub>3</sub>)  
<sup>13</sup>C NMR (100 MHz, CDCl<sub>3</sub>)

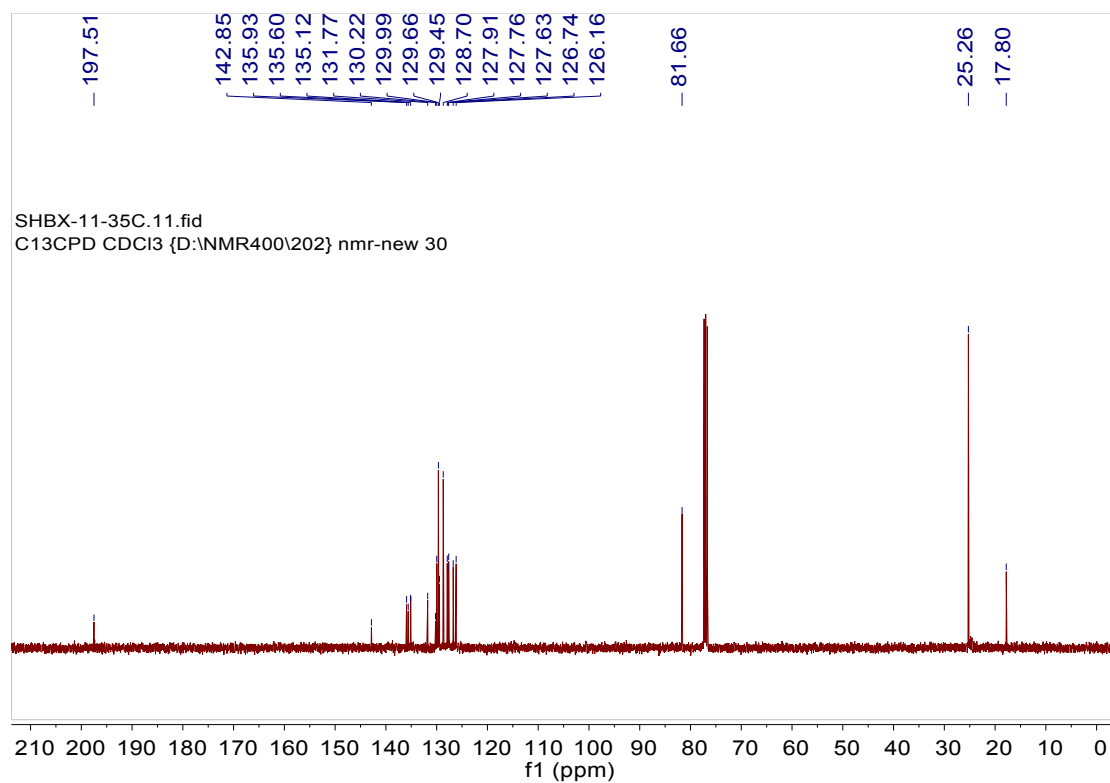

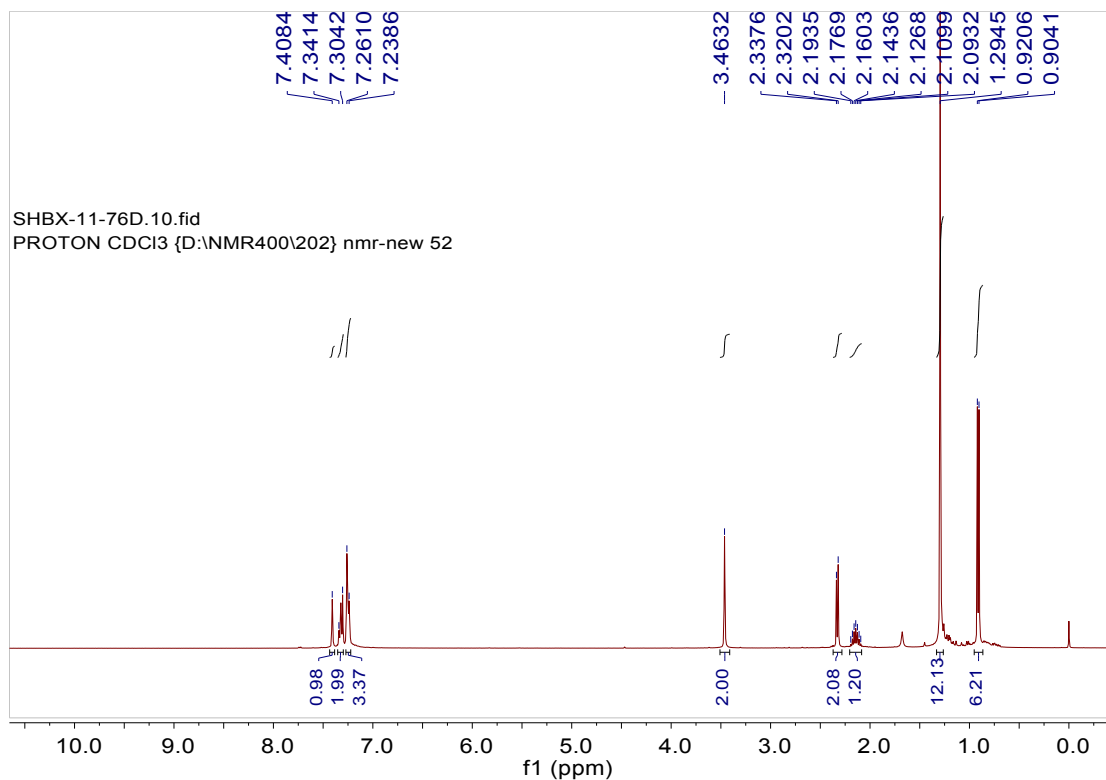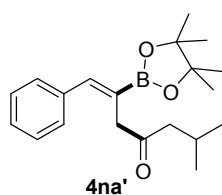

<sup>1</sup>H NMR (400 MHz, CDCl<sub>3</sub>)  
<sup>13</sup>C NMR (100 MHz, CDCl<sub>3</sub>)

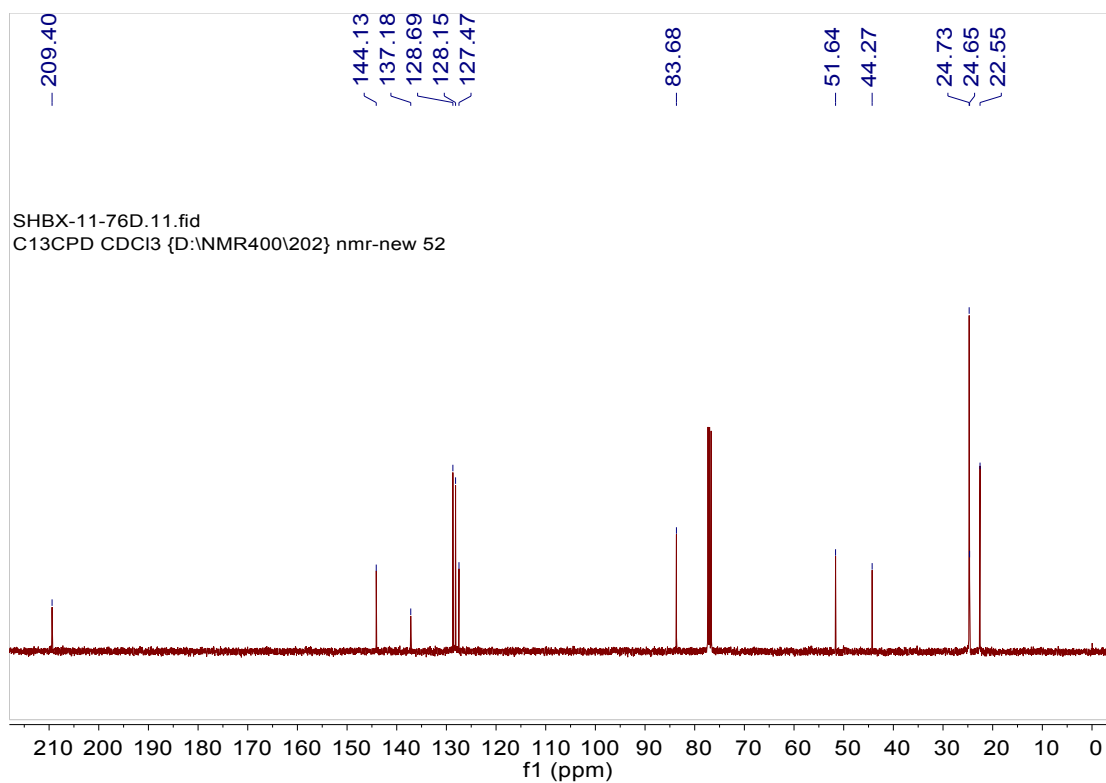



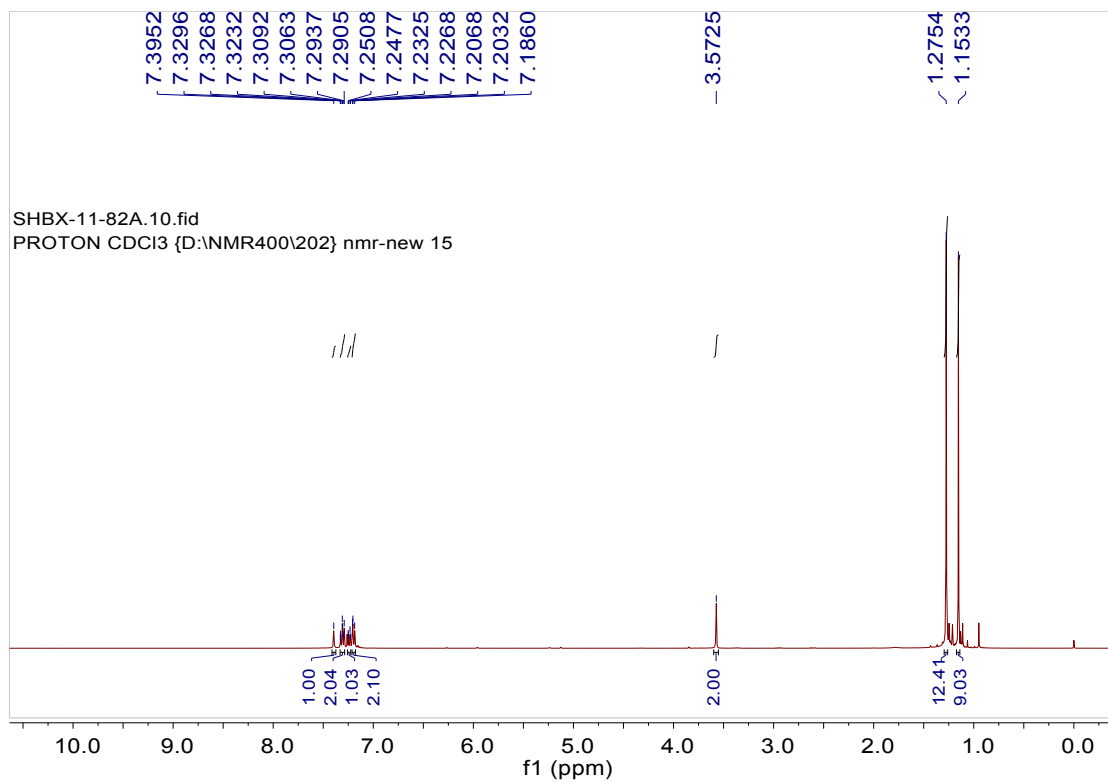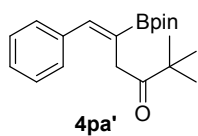

<sup>1</sup>H NMR (400 MHz, CDCl<sub>3</sub>)  
<sup>13</sup>C NMR (100 MHz, CDCl<sub>3</sub>)

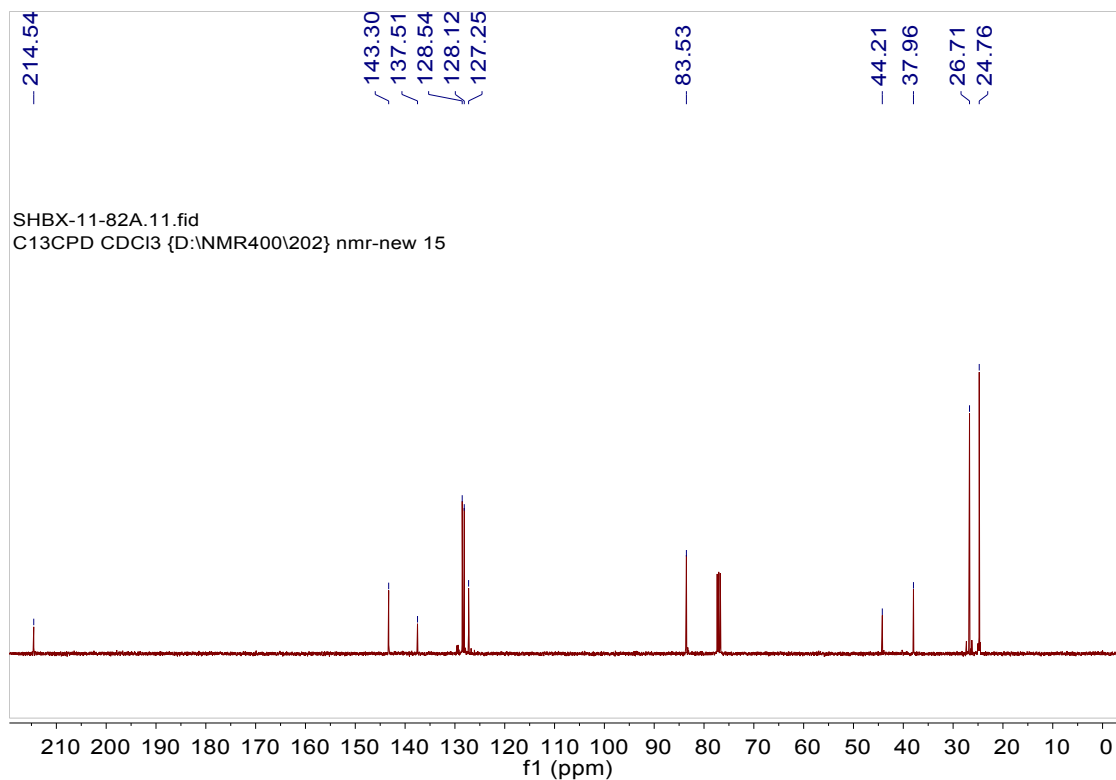

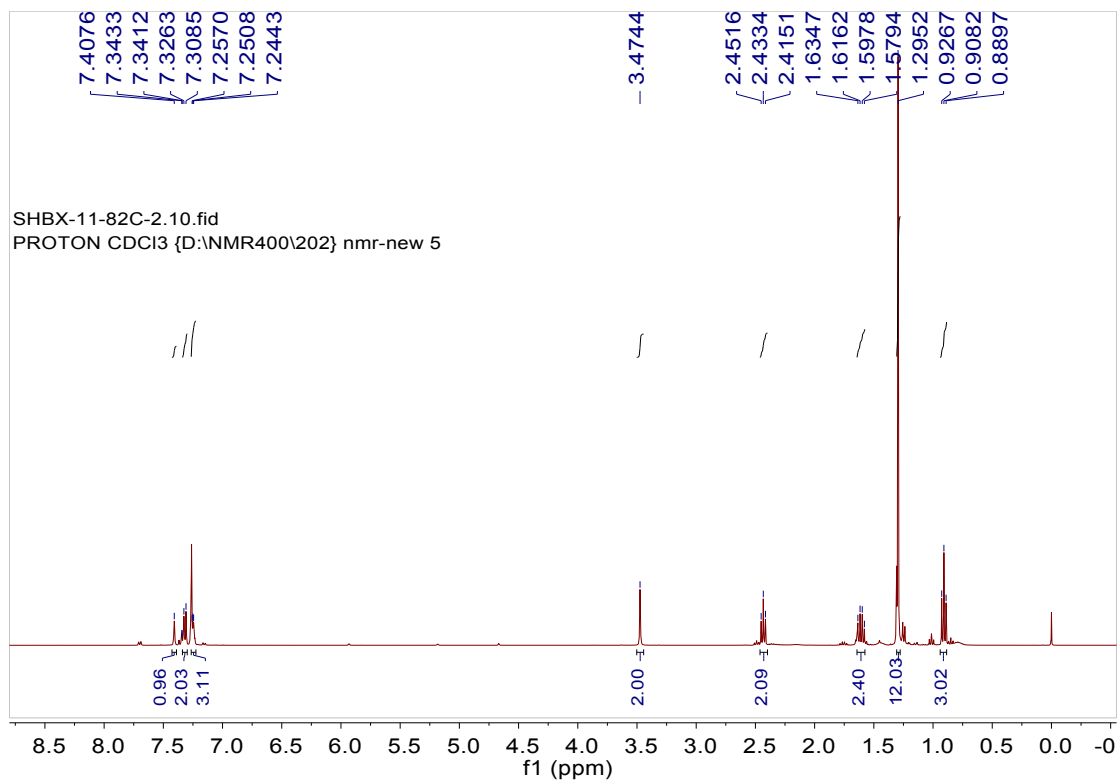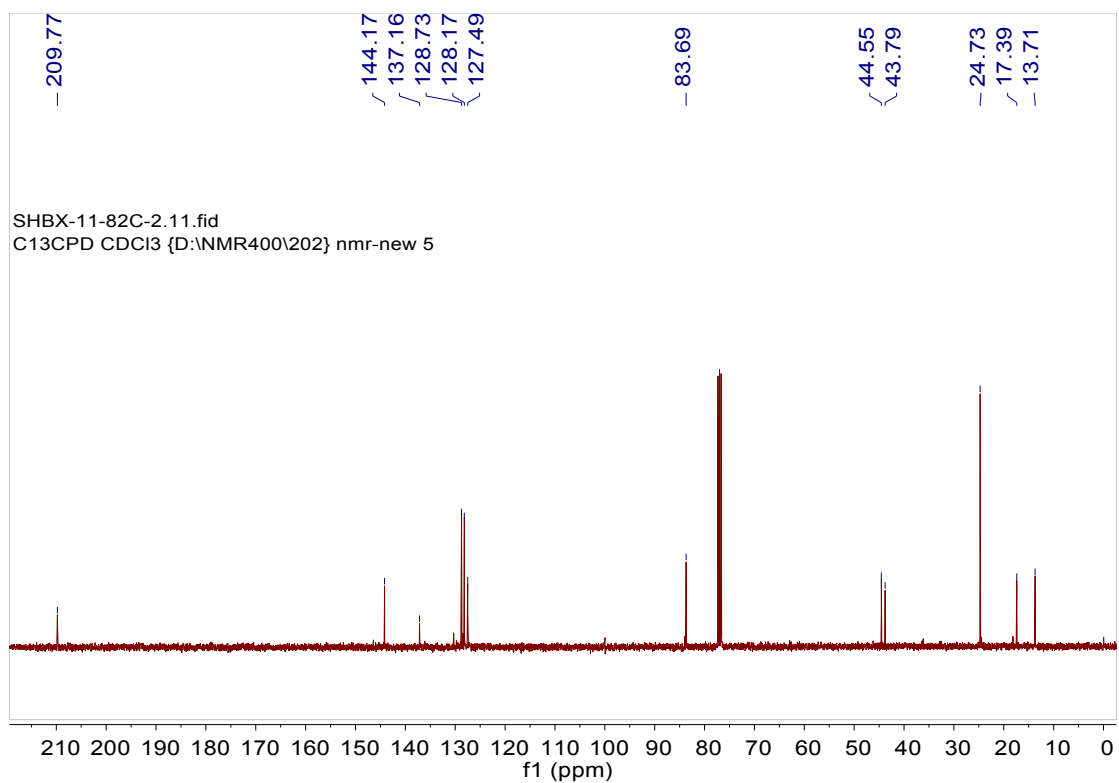

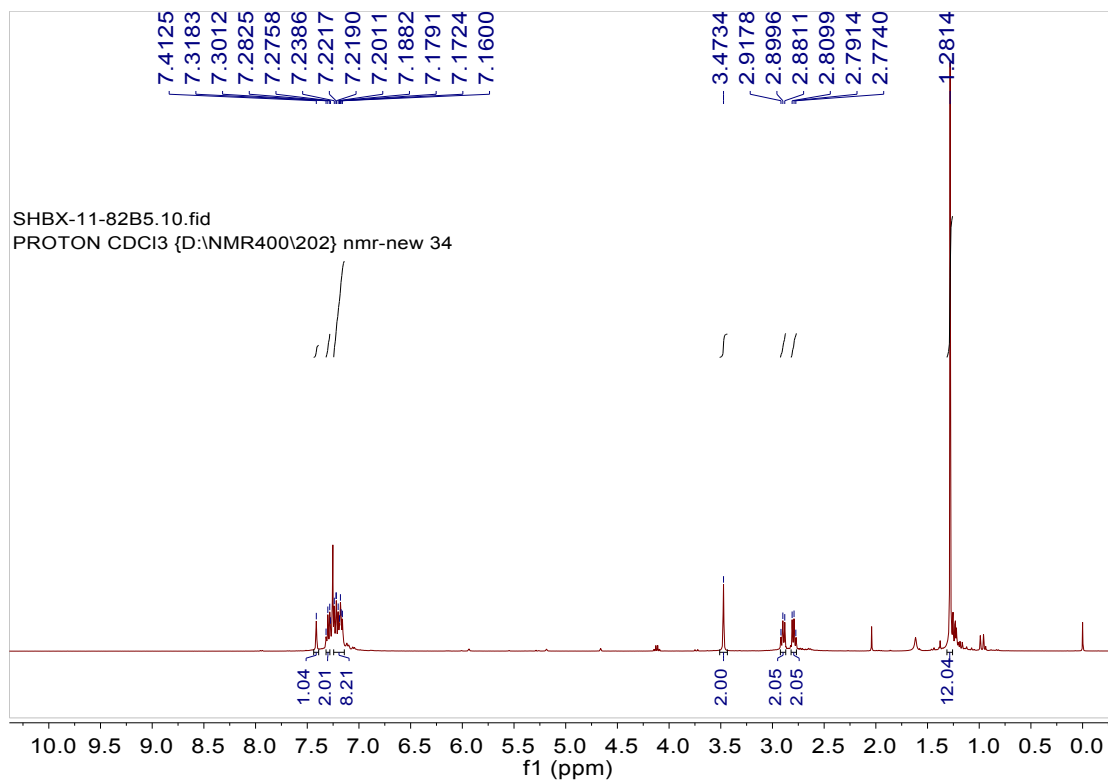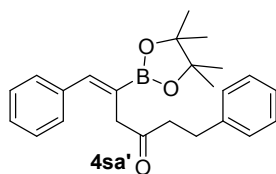

<sup>1</sup>H NMR (400 MHz, CDCl<sub>3</sub>)  
<sup>13</sup>C NMR (100 MHz, CDCl<sub>3</sub>)

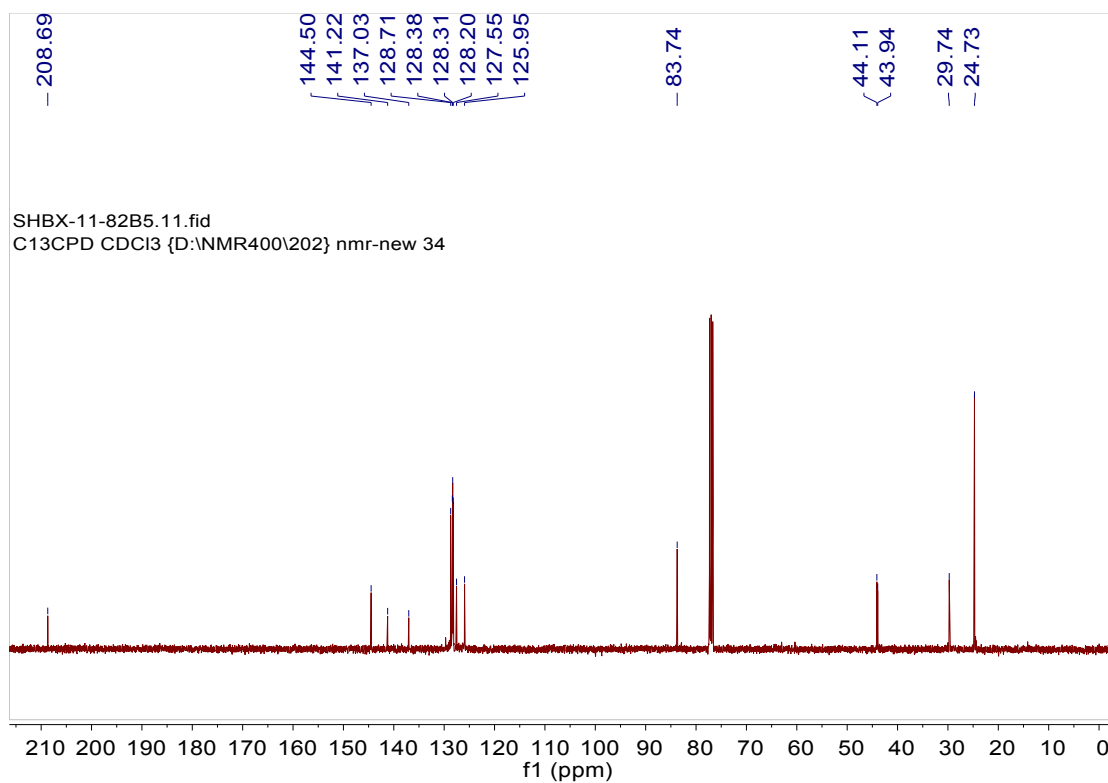

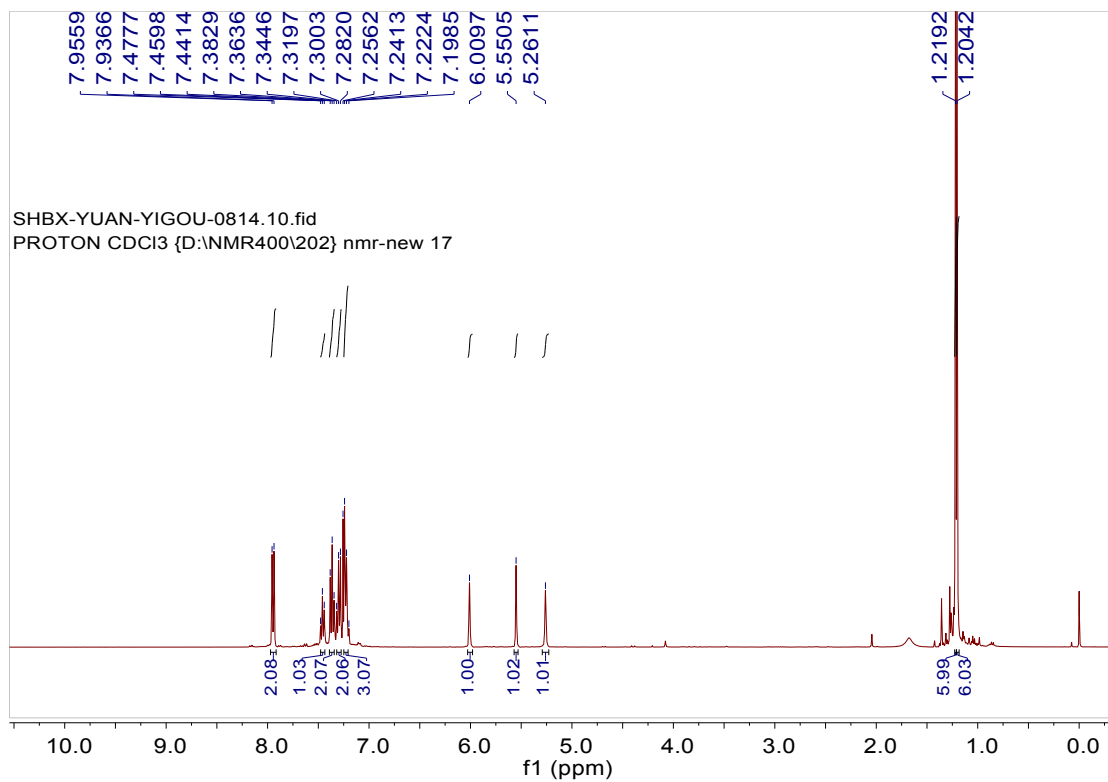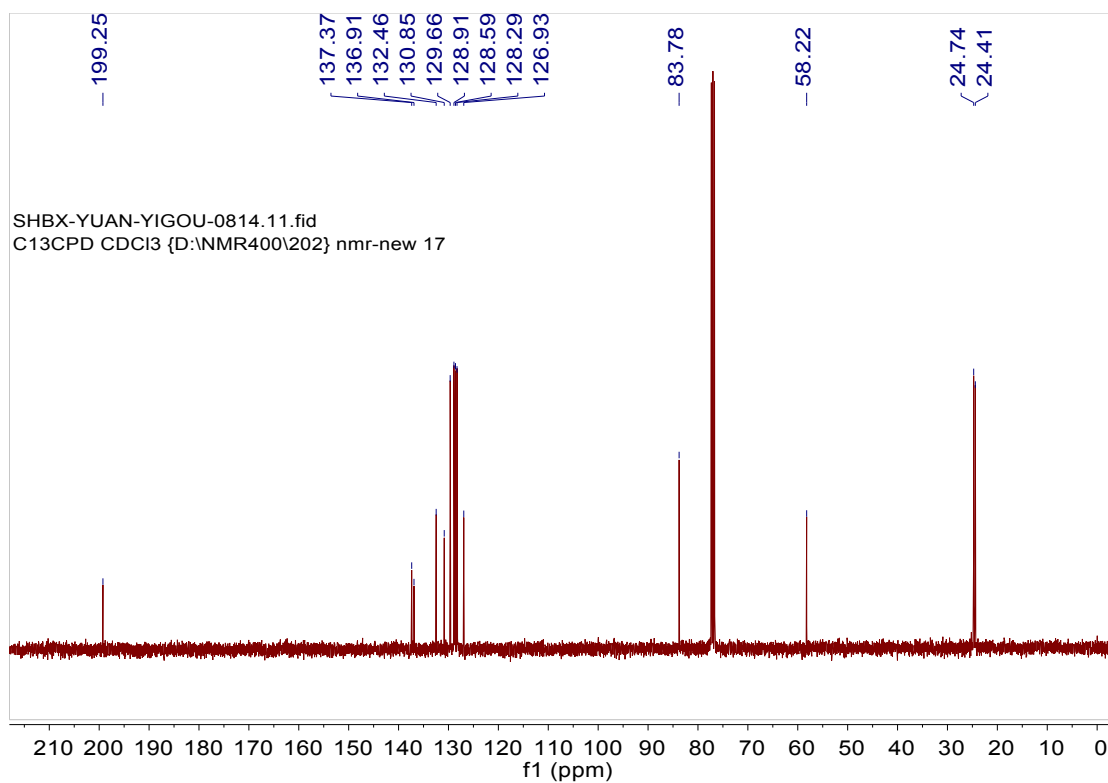

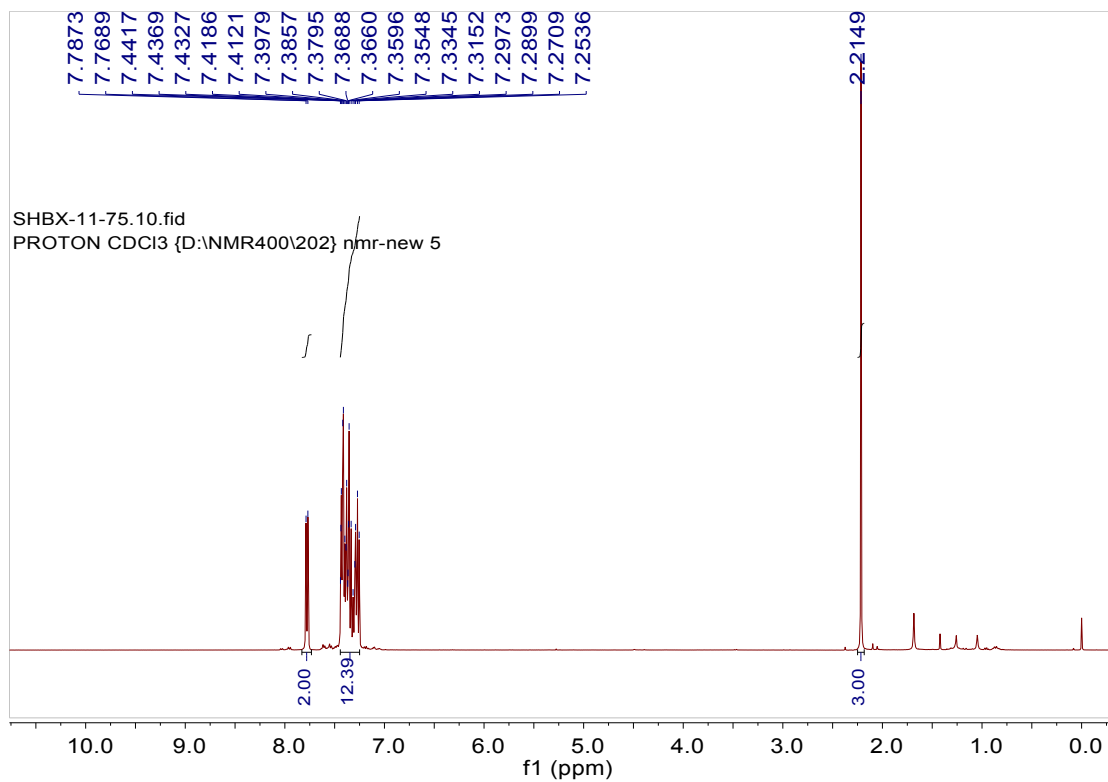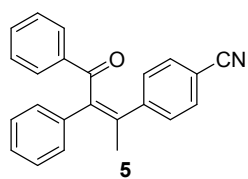

<sup>1</sup>H NMR (400 MHz, CDCl<sub>3</sub>)  
<sup>13</sup>C NMR (100 MHz, CDCl<sub>3</sub>)

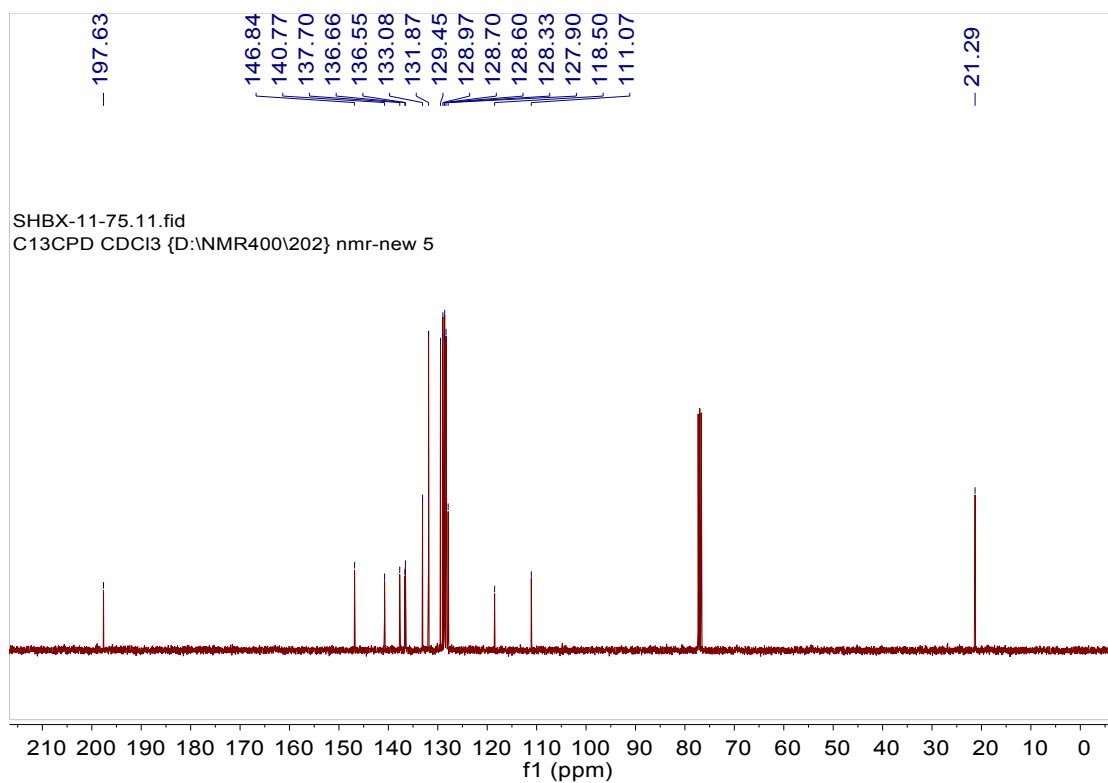

Supplement: d0ob02008g1.pdf [file d0ob02008g1.pdf]
